# Supplementary material for: Tropical tropospheric ozone distribution and trends from in situ and satellite data
Source: Copernicus journal article supplement (doi:10.5194/acp-24-9975-2024), 2024-09-09
Supplement: Supplementary file 1 [file acp-24-9975-2024-supplement.pdf]

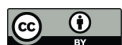

*Supplement of*

## **Tropical tropospheric ozone distribution and trends from in situ and satellite data**

**Audrey Gaudel et al.**

*Correspondence to:* Audrey Gaudel ([audrey.gaudel@noaa.gov](mailto:audrey.gaudel@noaa.gov))

The copyright of individual parts of the supplement might differ from the article licence.

## Supplementary Material

### Section S1. Sampling sensitivity test for in-situ measurements

Even though high temporal and spatial variability in ozone is well recognized, the positive impact of abundant sample sizes on detectability of trends is often under-appreciated. In terms of detecting trends in the free troposphere several previous studies concluded that a sampling frequency of once per week generally fails to produce accurate monthly mean and trend values (Logan, 1999; Saunio et al., 2012; Chang et al., 2020).

Since the in-situ sampling scheme is infrequent and sporadic at most locations in this study, we use the IAGOS dataset collected above Africa which has the highest measurement density (more than 30 profiles in some individual months) to explore the impact of sample size on trend detection in the tropics. In order to provide a baseline reference at northern mid-latitudes, we also analyze the IAGOS data collected above Frankfurt, Germany. Table S2 provides monthly sample sizes from Africa and Frankfurt. Even though Africa has the most abundant IAGOS data in the tropics, the overall sample sizes are still small compared to Frankfurt. The following analysis focuses on observations in the free troposphere (700-300 hPa).

We compute mean absolute percentage error (MAPE) between the ozone trend inferred from the complete data record and from an ensemble of trend estimates for randomly subsampled data sets. As in Chang et al. (2020), trend estimates are defined as accurate once MAPE falls below 5% with increasing sampling frequency  $r$ . Table S3 provides the MAPE obtained from 1000 random subsamples composed of a fixed number of  $r$  profiles per month. The sampling strategy can be summarized as follows: if a given month has  $n$  profiles and the requested monthly sampling frequency is  $r$ , then 1) if  $n \leq r$ , we select all the profiles, this is fixed in each iteration; 2) if  $n > r$ , we select  $r$  profiles randomly in each iteration. From the table we see that 19 profiles per month are required to produce an accurate trend estimate over Frankfurt, which is consistent with Chang et al. (2020). However, over Africa, the decrease of the trend MAPE is slow and MAPE remains high even when the considered sampling frequency is increased because there is a sufficient number of IAGOS profiles ( $n > r$ ) for just a small fraction of individual months.

The above finding is limited by the fact that we cannot meet the predetermined criterion for most cases in Africa (and the 5% criterion cannot be met). To determine the threshold for minimum sampling frequency for basic trend detection in the tropics, we further investigate the relationship between the magnitude of trends and the sampling frequency. In this case, basic trend detection refers to enough profiles to determine if there is a trend at a 2-sigma level, based on either the interquartile range (i.e. the 75% percentile) or tail (i.e. the worst-case scenario) of the sampling distribution, but it is not ideal for an accurate trend quantification. Figure S2 shows the distribution of median trends for a sampling frequency of 2, 4, 6, 8, 10 and 12 profiles a month, from 800 to 300 hPa with a 50 hPa vertical resolution. We can see the range of sampled trends becomes smaller when the sampling frequency is increased. Figures S2 and S3 show how the signal-to-noise ratios (i.e the ratio between the trend value and its uncertainty) of sampled trends vary with different sampling frequencies at 800 to 300 hPa. These figures reveal many

43 considerations regarding the relationship between sampling frequency and the magnitude of  
44 trends:

- 45 1. If the magnitude of the trend is strong (e.g.  $> 3 \text{ nmol mol}^{-1}/\text{decade}$  at 800 hPa), the trend  
46 can be detected at a low sampling frequency: 2 and 6 profiles per month are required for  
47 basic trend detection in 75% samples and the worst-case scenario (i.e. even for the worst  
48 case, the trend can be detected), respectively.
- 49 2. If the magnitude of the trend is moderate (e.g. between 1 and 2  $\text{nmol mol}^{-1}/\text{decade}$  at 600  
50 hPa):  
51 7 and 15 profiles per month are required for basic trend detection in 75% samples and the  
52 worst-case scenario, respectively.
- 53 3. If the trend is weak (e.g. around 1  $\text{nmol mol}^{-1}/\text{decade}$  at 700 hPa), a high sampling  
54 frequency is required to detect the weak signal: 14 profiles per month are required for  
55 basic trend detection in 75% samples, and the worst-case scenario cannot be prevented in  
56 this analysis.
- 57 4. For pressure surfaces with weak and highly uncertain trends (e.g. 350 and 500 hPa,  
58 Figure S1), the same conclusion can be generally drawn at either low or high sampling  
59 rates.

60

61 Based on the above discussion, a typical sampling frequency of once per week is only sufficient  
62 for detection of very large trends (e.g.  $> |3| \text{ nmol mol}^{-1}/\text{decade}$ ), which are not common in the  
63 free troposphere. We also conclude that a sampling frequency of 7 profiles per month is  
64 sufficient for basic trend detection of tropospheric ozone in the tropics, when the magnitude of a  
65 trend is above  $|1| \text{ nmol mol}^{-1}/\text{decade}$ , but additional data are required for accurate quantification.  
66 It should be noted that natural variability also plays a role in trend detection and attribution, but  
67 its impact is expected to be more pronounced when we conduct sensitivity analyses on varying  
68 lengths of the data record, which is beyond the scope of the current analysis. Even though the  
69 influence between natural variability and sampling frequency is typically inseparable, by  
70 focusing on the same data set and same data length, the impact of natural variability should be  
71 weak on this sensitivity analysis. In monitoring long-term changes, the first problem is to detect  
72 a trend (as we investigated in this analysis). Once the presence of a trend is established, any  
73 additional information will help us to improve the accuracy and precision of trend detection.

74

## 75 **Section S2. Analysis steps for data fusion methodology**

76 The features of our data fusion are, (i) to consider systematic ozone variability across vertical  
77 profile time series, instead of treating observations at different pressure surfaces as a set of  
78 independent time series. By taking account of the vertical correlation, the method produces more  
79 consistent trend estimates vertically, and the uncertainty can be effectively reduced; and (ii) to  
80 use the inverse of the (monthly) squared standard error as the weight when combining different  
81 sources of data records, so a record with a higher sampling frequency and/or lower variability  
82 has a higher influence. Analysis steps for data fusion can be described as follows (also described  
83 in Chang et al.(2022)):

84 For each data set and pressure surface (at 10 hPa vertical resolution), the time series is  
 85 deseasonalized into data anomaly series, by using four harmonic functions. Explicitly, the  
 86 anomalies are calculate by

$$87 \quad y - a_0 - a_1 \sin(\text{Month} \times \pi/6) - a_2 \cos(\text{Month} \times \pi/6) - a_3 \sin(\text{Month} \times \pi/3) \\ 88 \quad - a_4 \cos(\text{Month} \times \pi/3)$$

- 89 1. where  $y$  is the ozone value, and  $(a_0, \dots, a_4)$  are coefficients to determine the seasonal  
 90 cycle (see Chang et al. (2023) for implementation code).
- 91 2. For each data set and pressure surface, the anomaly series is standardized by dividing by  
 92 its standard deviation, so the magnitude of data variability is similar between different  
 93 pressure surfaces. The rationale of the regression problem is to find the best fit such that  
 94 the sum of residuals is minimized. In terms of ozone profiles, ozone values in the upper  
 95 troposphere are typically greater than the lower troposphere. Under this condition (since  
 96 we consider vertical variability altogether), the statistical model prioritizes the reduction  
 97 of fitted errors in the upper troposphere over the lower troposphere. Standardization  
 98 removes this prioritization, and makes each vertical layer equally important across the  
 99 troposphere. This consideration enables small scale variability to be better resolved by  
 100 the statistical model.
- 101 3. Different sources of data records are combined by their normalized deviations (ND), and  
 102 implemented under the framework of generalized additive models (GAM) using R  
 103 package mgcv (Wood, 2017). Based on the data preparation from the previous steps, the  
 104 main syntax for GAM data integration in R can be demonstrated as follows:

```

> head(dt)
  Year Month index Pressure site Ozone_ppbv Ozone_ppbv_SE Ozone_anomaly_ppbv Ozone_standardized
248 1994     8     8     200     1  52.04750    9.643967          -0.07382282          -0.006870425
249 1994     8     8     210     1  46.90250    8.614597          -3.09289957          -0.312953398
250 1994     8     8     220     1  47.93800    7.589113          -1.12045218          -0.118577743
251 1994     8     8     230     1  46.49067    6.762999          -2.28952312          -0.245373816
252 1994     8     8     240     1  45.06875    6.251207          -3.52660169          -0.370912261
253 1994     8     8     250     1  44.44625    6.059981          -3.58347891          -0.391296508
> tail(dt)
  Year Month index Pressure site Ozone_ppbv Ozone_ppbv_SE Ozone_anomaly_ppbv Ozone_standardized
43014 2019    12    312     950     2  19.80000    11.63750           0.7552521           0.11666760
43015 2019    12    312     960     2  19.43333    11.70272           0.9353689           0.14621273
43016 2019    12    312     970     2  18.91667    11.89038           1.2253181           0.18773597
43017 2019    12    312     980     2  17.90000    12.27958           0.6877533           0.10584048
43018 2019    12    312     990     2  16.30000    13.05189           -0.3003434          -0.04605116
42929 2019    12    312    1000     2  14.43333    14.07423           -1.5527083          -0.22962453
> weights=(1/dt$Ozone_ppbv_SE^2)
> model=gam(Ozone_standardized ~ factor(site) + s(index, Pressure, bs="ds", k=2000), data=dt, weights=weights)

```

105 where ‘index’ is the monthly index spanned over the study period, and ‘Pressure’ is the  
 106 observed pressure surface. This formulation indicates that, (i) temporal and vertical  
 107 variabilities are modeled jointly (instead of two independent terms, based on the  
 108 generalized thin plate splines); and (ii) the model fit is weighted by data uncertainty. The  
 109 results can then be extracted by using predict(model, type='terms').

110 It should be noted that in terms of data fusion, it is also interesting to study the remaining  
 111 variability from each individual dataset, e.g., after separating regional variations from the  
 112 data set, the local influence can thus be better understood. Nevertheless, in this study the  
 113

114 number of datasets to be integrated is too few (only two or three) to identify the  
 115 remainder in each dataset (Gomes, 2022). If sufficient datasets are available (e.g., five  
 116 data sources), one can replace the term factor(site) with a more sophisticated  
 117 representation:

```
118 ti(index, Pressure, site, bs=c("ds", "fs"), d=c(2, 1), k=c(300, 5))
```

119 (see Wood (2017) for further details), so the remaining variability in each data source can  
 120 be properly characterized.

121 4. The model produces fitted/fused monthly time series at each pressure layer. Trends can  
 122 be estimated after the fitted values are transformed back to the units of ppbv (reversing  
 123 the standardization). Further implementation details for trend analysis are described by  
 124 Chang et al. (2023).

125  
 126

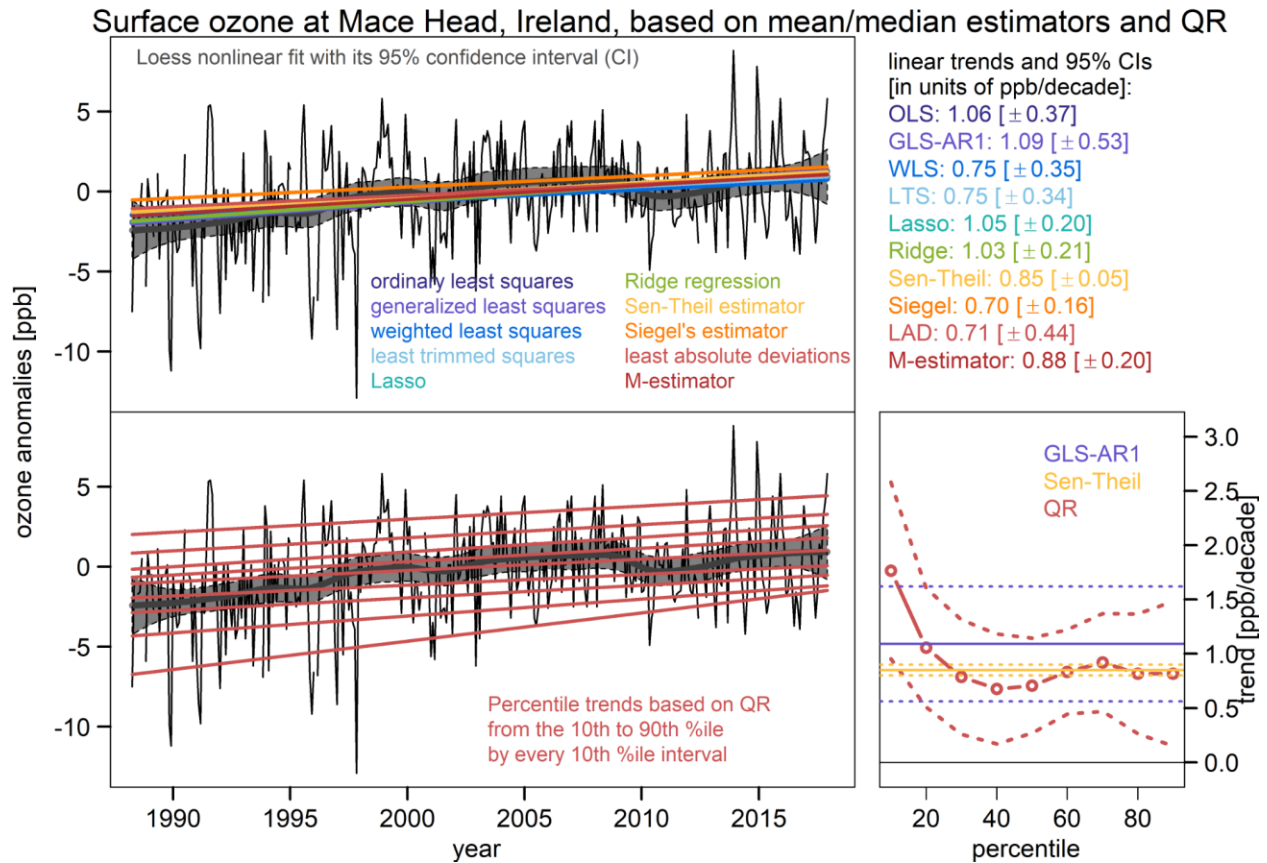

127  
 128 **Figure 1 of Chang et al. (2023).** A demonstration of the difference between a range of trend  
 129 methods (upper panel) and percentile trends derived from quantile regression (QR, lower panel),  
 130 based on surface ozone anomalies measured at Mace Head, Ireland (see Chang et al. (2023) for  
 131 further details).

132

133 **Section S3. Confidence scale for in situ trends**

134 This section provides a detailed description of the factors taken into consideration when  
135 assigning a confidence level to the in situ ozone trends reported in Table 1.

- 136 ● **Western Africa** (1994-2019): Data coverage is moderate (high sampling rate and  
137 moderate data gaps), combined with a low p-value associated with a strong trend,  
138 therefore **high confidence** is assigned to this region.
- 139 ● **India** (1994-2019): Data coverage is moderate (moderate data gaps and moderate  
140 sampling rates), combined with a low p-value associated with a strong trend. According  
141 to Table A1, high confidence should be assigned. However, since both the number of  
142 data gaps and sampling rates are on the fuzzy area around our criteria between low and  
143 moderate data availability, **moderate confidence** is assigned to this region.
- 144 ● **Samoa** (1994-2019): Data coverage is low (limited data gaps and low sampling rates),  
145 combined with a high p-value, so **very low confidence** is assigned to this region.
- 146 ● **Natal + Ascension Island** (1994-2019): Data coverage is low (limited data gaps but low  
147 sampling rates), combined with a low p-value, so **moderate confidence** is assigned to  
148 this region.
- 149 ● **Americas** (1994-2019): Data coverage is moderate (limited data gaps and moderate  
150 sampling rates), combined with a high p-value, so **low confidence** is assigned to this  
151 region.
- 152 ● **Southeast Asia** (1994-2019): Data coverage is moderate (moderate data gaps and  
153 moderate sampling rate), combined with a low p-value, so **high confidence** is assigned to  
154 this region.
- 155 ● **Malaysia/Indonesia** (1994-2019): Data coverage is low (moderate data gaps but low  
156 sampling rate), combined with a low p-value, so **moderate confidence** is assigned to this  
157 region.
- 158 ● **Western Africa, India and Samoa** (2004-2019): Data coverage is low (short time  
159 period), combined with a high p-value, so **very low confidence** is assigned in these  
160 regions.
- 161 ● **Natal + Ascension Island, Americas, Southeast Asia and Malaysia/Indonesia** (2004-  
162 2019): Data coverage is low (short time period), combined with a low p-value, so  
163 **moderate confidence** is assigned to these regions.

164  
165

166 **Section S4. The OMI/MLS measurements and drift corrections**

167

168 The Ozone Monitoring Instrument (OMI) and Microwave Limb Sounder (MLS) are two of four  
169 instruments on board the Aura spacecraft which is flown in a sun-synchronous polar orbit at 705  
170 km altitude with a 98.2° inclination. The Aura spacecraft was launched 15 July, 2004 and has an  
171 equatorial local crossing time of about 1:45 pm (ascending node). Both OMI and MLS  
172 instruments are still providing ozone measurements as of late 2023 which has yielded a nearly  
173 20-year record of tropospheric ozone for evaluating global trends and other applications. In this  
174 study we focus on the 2004-2019 time period.

175 OMI/MLS tropospheric column ozone (TCO) is derived using the residual technique of Fishman  
176 et al. (1990). Fishman et al. (1990) originally subtracted Stratospheric Aerosols and Gas  
177 Experiment (SAGE) stratospheric column ozone (SCO) from Total Ozone Mapping  
178 Spectrometer (TOMS) total ozone measurements. We apply the same approach where Aura MLS  
179 SCO is subtracted from coincident Aura OMI total column ozone to derive TCO. The OMI/MLS  
180 algorithm is discussed in detail by Ziemke et al. (2006) and here we briefly summarize this  
181 method. First, along-track measurements of daily MLS profile ozone are vertically integrated in  
182 pressure from the top of the atmosphere down to the tropopause pressure to measure SCO.  
183 National Centers for Environmental Prediction (NCEP) re-analyses are incorporated for  
184 tropopause pressure using the standard World Meteorological Organization (WMO) 2K km<sup>-1</sup>  
185 lapse-rate definition. Next, a spatial 2D (Gaussian + longitudinal) interpolation is used to fill in  
186 between the MLS SCO orbital-track measurements. Daily TCO is then determined by  
187 subtracting these SCO fields from OMI total column ozone fields. Finally, OMI/MLS TCO daily  
188 maps are averaged monthly to produce the final TCO product. The OMI/MLS product has a high  
189 sampling frequency, as shown in Figure S4 and Figure S5. Prior to 2009 each 5° x 5° grid cell  
190 had 300-500 measurements per month in the tropics; this number decreased to 200-400  
191 measurements per month after the row anomaly took effect (described below). The measurement  
192 uncertainty (one standard deviation) of the OMI/MLS product is approximately 7 DU for a daily  
193 retrieval at 1° x 1.25° resolution, or approximately 2 DU at 5° x 5° resolution. It is reasonable to  
194 ask if this measurement uncertainty impacts the calculation of long-term trends from the  
195 OMI/MLS product. This question is addressed by the statistical field of error analysis (Grubbs,  
196 1973; Taylor and Thompson, 1982; Moffat, 1988; Rabinovich, 2006; Buonaccorsi, 2010; Hughes  
197 and Hase, 2010). According to error analysis theory, if measurement uncertainty occurs  
198 randomly then the errors across a large sample size will cancel out and have little impact on the  
199 mean; in our case we are considering monthly mean values based on 200-400 OMI/MLS  
200 retrievals across a 5° x 5° grid cell. Given the very large sample size of the 5° x 5° OMI/MLS  
201 product the errors associated with measurement uncertainty cancel out and have little impact on  
202 the mean, and therefore little impact on the trend. Figure S6 below illustrates this concept using  
203 the ozonesondes above Debilt, The Netherlands (one profile per week), Uccle, Belgium (three  
204 profiles per week), and the IAGOS aircraft profiles above Europe (multiple profiles per day). All  
205 three data sets report clear positive trends for the period 1994-2019 based on monthly means  
206 produced from all available profiles (Figure S6a). In the next step random errors of 10%  
207 (representing measurement uncertainty) are imposed on all profiles. Figure S6b shows that the  
208 uncertainty of the monthly means increases slightly at Debilt and Uccle, but the uncertainty is  
209 almost unchanged for the IAGOS ensemble (due to the far greater sampling rates); the trend  
210 values at all three locations are almost unchanged, with only very slight increases in the 95%  
211 confidence intervals and p-values. In the final step random errors of 20% are imposed on all  
212 profiles (Figure S6c). These errors produce greater uncertainty of the monthly means for all three  
213 records, but the impact is greatest at Debilt which has the lowest sampling rate. Even though the  
214 imposed errors are relatively high, the overall trend values remain almost unchanged. The  
215 uncertainty of the trend values increases at all three sites, but the p-values remain below 0.05,  
216 and the impact is least for the IAGOS ensemble.

217 The OMI/MLS TCO measurements over time have encountered instrument drift and other long  
218 term quality issues including an OMI row-anomaly which became a large problem in late  
219 January 2009 and which still continues (Torres et al., 2018, and references therein). The row  
220 anomaly was caused by a physical obstruction in the optical path of the OMI instrument,  
221 resulting in about 1/3 of pixel measurements being flagged for non-use beginning in January  
222 2009. Ziemke et al. (2019) discusses previous ozonesonde evaluation of offset and drift/row  
223 anomaly corrections for the OMI/MLS TCO product. For that study corrections were made to  
224 include a mean +2 DU offset adjustment and a global  $-1.0 \text{ DU decade}^{-1}$  drift adjustment.

225 We have recently made a further adjustment to the OMI/MLS TCO long record guided by  
226 comparisons with ozonesondes, ground-based Brewer/Dobson total ozone, and OMI convective  
227 cloud differential (CCD) tropical TCO measurements. This new drift adjustment for OMI/MLS  
228 TCO begins by comparing OMI/MLS and ozonesonde daily TCO for October 2004-December  
229 2019. The ozonesondes used for this analysis are from the Southern Hemisphere Additional  
230 OZonesondes (SHADOZ) network (Thompson et al. 2017; Witte et al. 2017, 2018; Sterling et  
231 al., 2017) and measurements from the World Ozone and Ultraviolet Radiation Data Center  
232 (WOUDC) and Network for the Detection of Atmospheric Composition Change (NDACC)  
233 (deMazière et al., 2018).

234 Figures S7, S8, and S9 show time series of OMI/MLS and sonde daily TCO for the NH, tropics,  
235 and SH, respectively. Printed in each panel (in red) is a calculated linear fit of OMI/MLS minus  
236 sonde TCO where only coincident daily measurements were included. We chose sonde sites that  
237 had the most coverage over the long record. Because we collocate daily OMI/MLS and sondes  
238 for the line-fit analysis, we use all available sonde measurements even if there is as little as only  
239 one sonde measurement per month on average. In the NH (Figure S7) the mean drift difference  
240 of OMI/MLS minus sonde TCO is calculated to be  $+0.54 \pm 0.64 \text{ DU decade}^{-1}$ . For the tropics  
241 (Figure S8) the mean drift difference is  $+0.57 \pm 0.40 \text{ DU decade}^{-1}$ . In the SH (Figure S9) the  
242 mean drift difference is  $+1.33 \pm 0.98$ . From these results, we subjectively applied a new overall  
243 correction to OMI/MLS TCO of  $-0.6 \text{ DU decade}^{-1}$  everywhere at all latitudes and longitudes.

244 After combining this  $-0.6 \text{ DU decade}^{-1}$  correction with the previous  $-1 \text{ DU decade}^{-1}$  correction,  
245 the total drift correction is now equivalent to about  $-3 \text{ DU}$  total change over the long record. This  
246 overall  $-3 \text{ DU}$  drift correction coincides closely with calculated drift error for OMI total ozone of  
247 about  $+3 \text{ DU}$  ( $+1\%$ ) from ground-based Brewer and Dobson total ozone comparisons (e.g.,  
248 Figure S10 from G. Labow, personal communication, 2023). As an additional cross-check for  
249 the new adjustment, we also included comparisons with OMI CCD tropical TCO (Ziemke et al.,  
250 1998) as shown in Figure S11; this suggested an additional drift correction of about  $-0.5 \pm 0.30$   
251  $\text{DU decade}^{-1}$  which is comparable to the ozonesonde comparisons. Thus, all three of these  
252 analysis methods (sondes, ground total ozone, CCD) for evaluating positive drift in OMI/MLS  
253 TCO agree.

254

255

256 **Section S5. Tables and Figures**



257 **Table S1.** Description of IAGOS fleet with the airlines, airports and number of profiles for the  
 258 three focus time periods in this study (1995-2019 for long-term trends calculation, 2004-2019 for  
 259 satellite evaluation, and 2014-2019 for present-day ozone distribution). All data above all  
 260 airports listed in the table are used to quantify the distribution and trends of tropical tropospheric  
 261 ozone as well as the evaluation of the satellite data.

| Region     | Airline       | Airport      | N profiles [1995-2019] | N profiles [2004-2019] | N profiles [2014-2019] |
|------------|---------------|--------------|------------------------|------------------------|------------------------|
| Americas   | Austrian      | Punta Cana   | 11                     | 0                      | 0                      |
|            | Lufthansa     | Bogota       | 560                    | 356                    | 347                    |
|            | Air France    |              |                        |                        |                        |
|            | Lufthansa     | Saint Martin | 89                     | 75                     | 32                     |
|            | Air France    |              |                        |                        |                        |
|            | Lufthansa     | Panama City  | 14                     | 14                     | 14                     |
|            | Iberia        | Guayaquil    | 4                      | 2                      | 2                      |
|            | Lufthansa     |              |                        |                        |                        |
|            | Lufthansa     | Lima         | 24                     | 0                      | 0                      |
|            | Air France    |              |                        |                        |                        |
|            | Lufthansa     | Maracay      | 1                      | 0                      | 0                      |
|            | Lufthansa     | San Juan     | 45                     | 0                      | 0                      |
|            | Lufthansa     | Antigua      | 31                     | 0                      | 0                      |
|            | Iberia        | San Jose     | 32                     | 32                     | 32                     |
|            | Lufthansa     |              |                        |                        |                        |
|            | Lufthansa     | Caracas      | 1214                   | 633                    | 85                     |
|            | Air France    |              |                        |                        |                        |
|            | Lufthansa     | Mexico City  | 52                     | 3                      | 3                      |
|            | Air France    |              |                        |                        |                        |
|            | Air France    | Cayenne      | 216                    | 0                      | 0                      |
|            | Lufthansa     | Quito        | 72                     | 1                      | 1                      |
|            | Air France    |              |                        |                        |                        |
|            | Lufthansa     | Cali         | 2                      | 0                      | 0                      |
| Air France | Recife        | 25           | 0                      | 0                      |                        |
| Lufthansa  | Santo Domingo | 2            | 0                      | 0                      |                        |
| Lufthansa  | Porlamar      | 2            | 0                      | 0                      |                        |
| Austrian   | Puerto Plata  | 12           | 0                      | 0                      |                        |
|            |               |              |                        |                        |                        |
|            | Lufthansa     | Malabo       | 182                    | 182                    | 182                    |
|            | Air France    |              |                        |                        |                        |
|            | Air France    | Yaounde      | 47                     | 16                     | 6                      |
|            | Lufthansa     | Libreville   | 31                     | 5                      | 2                      |
|            | Air France    |              |                        |                        |                        |
|            | Lufthansa     | Abuja        | 376                    | 355                    | 351                    |
|            | Air France    |              |                        |                        |                        |

|  |             |               |     |     |     |
|--|-------------|---------------|-----|-----|-----|
|  | Air France  | Ndjamena      | 25  | 25  | 23  |
|  | Air France  | Abidjan       | 233 | 38  | 35  |
|  | Lufthansa   |               |     |     |     |
|  | Sabena      |               |     |     |     |
|  | Air France  | Bamako        | 48  | 48  | 40  |
|  | Sabena      | Lagos         | 761 | 441 | 396 |
|  | Lufthansa   |               |     |     |     |
|  | Air France  |               |     |     |     |
|  | Air France  | Ouagadougou   | 122 | 113 | 74  |
|  | Lufthansa   | Tahoua        | 2   | 2   | 2   |
|  | Air France  | Djibouti      | 11  |     | 9   |
|  | Lufthansa   | Port Harcourt | 190 | 188 | 185 |
|  | Air France  |               |     |     |     |
|  | Air France  | Dakar         | 101 | 12  | 0   |
|  | Lufthansa   |               |     |     |     |
|  | Sabena      |               |     |     |     |
|  | Lufthansa   | Bamenda       | 1   | 1   | 1   |
|  | Sabena      | Entebbe       | 75  |     | 0   |
|  | Air France  | Nouakchott    | 91  | 62  | 58  |
|  | Lufthansa   | Khartoum      | 272 |     | 14  |
|  | Air France  | Accra         | 139 | 66  | 43  |
|  | Air Namibia |               |     |     |     |
|  | Lufthansa   |               |     |     |     |
|  | Air France  | Niamey        | 123 | 113 | 56  |
|  | Lufthansa   | Freetown      | 22  | 22  | 18  |
|  | Air France  |               |     |     |     |
|  | Lufthansa   | Jeddah        | 95  |     | 95  |
|  | Sabena      | Douala        | 215 | 87  | 53  |
|  | Air France  |               |     |     |     |
|  | Sabena      | Lome          | 103 | 72  | 58  |
|  | Air France  |               |     |     |     |
|  | Sabena      | Cotonou       | 104 | 76  | 68  |
|  | Air France  |               |     |     |     |
|  | Air France  | Conakry       | 74  | 49  | 45  |
|  | Lufthansa   |               |     |     |     |
|  | Sabena      |               |     |     |     |
|  | Air France  | Pointe-noire  | 28  | 28  | 28  |
|  | Sabena      | Kigali        | 64  |     | 0   |
|  | Air Namibia | Brazzaville   | 40  | 31  | 29  |
|  | Air France  |               |     |     |     |
|  | Air France  | Kinshasa      | 102 | 19  | 17  |
|  | Sabena      |               |     |     |     |

|                |                |                  |      |     |     |
|----------------|----------------|------------------|------|-----|-----|
|                | Lufthansa      |                  | 254  | 210 | 89  |
|                | Air Namibia    | Luanda           |      |     |     |
|                | Air France     |                  |      |     |     |
|                |                |                  |      |     |     |
| India          | Cathay Pacific | Chennai          | 680  | 437 | 209 |
|                | Lufthansa      |                  |      |     |     |
|                | Sabena         |                  |      |     |     |
|                | Air France     | Bangalore        | 32   | 32  | 32  |
|                | Austrian       | Male             | 80   | 4   | 4   |
|                | LTU            |                  |      |     |     |
|                | Lufthansa      |                  |      |     |     |
|                | Austrian       | Colombo          | 58   | 19  | 19  |
|                | Lufthansa      |                  |      |     |     |
|                | LTU            |                  |      |     |     |
|                | Austrian       | Mumbai           | 177  | 56  | 28  |
|                | Cathay Pacific |                  |      |     |     |
|                | Lufthansa      |                  |      |     |     |
|                | Air France     |                  |      |     |     |
| Cathay Pacific | Hyderabad      | 552              | 552  | 12  |     |
| Lufthansa      |                |                  |      |     |     |
|                |                |                  |      |     |     |
| Southeast Asia | Cathay Pacific | Cebu             | 18   | 18  | 18  |
|                | Lufthansa      | Bangkok          | 1535 | 895 | 598 |
|                | Air France     |                  |      |     |     |
|                | Austrian       |                  |      |     |     |
|                | Cathay Pacific |                  |      |     |     |
|                | China Airlines |                  |      |     |     |
|                | China Airlines | Manila           | 191  | 191 | 146 |
|                | Austrian       |                  |      |     |     |
|                | Cathay Pacific |                  |      |     |     |
|                | Lufthansa      |                  |      |     |     |
|                | China Airlines | Ho Chi Minh City | 367  | 231 | 182 |
|                | Cathay Pacific |                  |      |     |     |
| Lufthansa      |                |                  |      |     |     |

|                    |                |              |     |     |     |
|--------------------|----------------|--------------|-----|-----|-----|
|                    | Air France     |              |     |     |     |
|                    | China Airlines | Guam         | 8   | 8   | 8   |
|                    | Cathay Pacific | Hong Kong    | 80  | 80  | 80  |
|                    | China Airlines |              |     |     |     |
|                    |                |              |     |     |     |
| Malaysia/Indonesia | Lufthansa      | Paya Lebar   | 1   | 0   | 0   |
|                    | Austrian       | Darwin       | 3   | 0   | 0   |
|                    | China Airlines | Jakarta      | 113 | 86  | 61  |
|                    | Cathay Pacific |              |     |     |     |
|                    | Lufthansa      |              |     |     |     |
|                    | Air France     |              |     |     |     |
|                    | Cathay Pacific | Surabaya     | 18  | 18  | 18  |
|                    | China Airlines |              |     |     |     |
|                    | China Airlines | Kuala Lumpur | 208 | 192 | 139 |
|                    | Cathay Pacific |              |     |     |     |
|                    | China Airlines | Denpasar     | 32  | 32  | 32  |
|                    | Cathay Pacific |              |     |     |     |
|                    | China Airlines | Singapore    | 265 | 143 | 92  |
|                    | Cathay Pacific |              |     |     |     |
|                    | Lufthansa      |              |     |     |     |
| Air France         |                |              |     |     |     |

262

263

264

265

266

267

268

269 **Table S2.** Number of IAGOS profiles by year and month above Africa (left panel) and  
 270 Frankfurt, Germany (right panel).

|      | 1  | 2  | 3  | 4  | 5  | 6  | 7  | 8  | 9  | 10 | 11 | 12 |
|------|----|----|----|----|----|----|----|----|----|----|----|----|
| 1997 | 0  | 0  | 0  | 6  | 52 | 37 | 48 | 65 | 40 | 58 | 28 | 8  |
| 1998 | 9  | 23 | 9  | 2  | 4  | 2  | 4  | 2  | 24 | 6  | 8  | 10 |
| 1999 | 22 | 18 | 13 | 15 | 12 | 20 | 32 | 8  | 2  | 30 | 15 | 12 |
| 2000 | 22 | 10 | 20 | 44 | 38 | 18 | 54 | 40 | 16 | 36 | 23 | 6  |
| 2001 | 18 | 14 | 32 | 66 | 0  | 0  | 0  | 4  | 2  | 29 | 10 | 12 |
| 2002 | 20 | 45 | 37 | 0  | 0  | 0  | 2  | 0  | 1  | 18 | 8  | 2  |
| 2003 | 19 | 32 | 4  | 14 | 30 | 12 | 38 | 47 | 42 | 66 | 46 | 10 |
| 2004 | 34 | 18 | 22 | 0  | 2  | 13 | 20 | 4  | 2  | 32 | 0  | 0  |
| 2007 | 12 | 6  | 0  | 0  | 0  | 0  | 0  | 0  | 0  | 0  | 0  | 4  |
| 2008 | 6  | 2  | 4  | 2  | 2  | 0  | 2  | 2  | 2  | 2  | 0  | 2  |
| 2009 | 8  | 2  | 22 | 4  | 0  | 0  | 8  | 0  | 0  | 0  | 0  | 0  |
| 2010 | 0  | 3  | 0  | 0  | 0  | 0  | 0  | 0  | 0  | 5  | 0  | 2  |
| 2011 | 0  | 4  | 6  | 0  | 0  | 0  | 21 | 2  | 4  | 2  | 6  | 10 |
| 2012 | 0  | 6  | 4  | 7  | 0  | 0  | 14 | 2  | 17 | 32 | 30 | 54 |
| 2013 | 70 | 21 | 21 | 8  | 0  | 33 | 34 | 6  | 2  | 29 | 32 | 36 |
| 2014 | 34 | 9  | 0  | 13 | 4  | 16 | 0  | 0  | 0  | 0  | 0  | 0  |
| 2015 | 0  | 4  | 14 | 44 | 38 | 0  | 10 | 19 | 38 | 56 | 33 | 68 |
| 2016 | 55 | 61 | 49 | 37 | 42 | 42 | 57 | 36 | 33 | 16 | 23 | 44 |
| 2017 | 62 | 40 | 18 | 54 | 80 | 86 | 51 | 60 | 86 | 38 | 56 | 19 |
| 2018 | 4  | 15 | 96 | 51 | 52 | 64 | 49 | 7  | 5  | 0  | 0  | 16 |
| 2019 | 6  | 14 | 28 | 24 | 28 | 31 | 29 | 30 | 24 | 28 | 24 | 14 |

|      | 1   | 2   | 3   | 4   | 5   | 6   | 7   | 8   | 9   | 10  | 11  | 12  |
|------|-----|-----|-----|-----|-----|-----|-----|-----|-----|-----|-----|-----|
| 1994 | 0   | 0   | 0   | 0   | 0   | 0   | 0   | 62  | 101 | 96  | 98  | 116 |
| 1995 | 122 | 141 | 121 | 119 | 115 | 125 | 141 | 109 | 150 | 64  | 100 | 84  |
| 1996 | 139 | 123 | 39  | 123 | 153 | 128 | 121 | 158 | 101 | 102 | 145 | 103 |
| 1997 | 168 | 115 | 134 | 107 | 156 | 180 | 192 | 185 | 192 | 162 | 114 | 143 |
| 1998 | 185 | 146 | 158 | 137 | 165 | 126 | 121 | 187 | 181 | 160 | 141 | 143 |
| 1999 | 113 | 148 | 131 | 132 | 169 | 182 | 219 | 201 | 191 | 206 | 190 | 198 |
| 2000 | 177 | 163 | 172 | 218 | 209 | 167 | 196 | 168 | 151 | 155 | 135 | 131 |
| 2001 | 134 | 109 | 140 | 150 | 101 | 92  | 127 | 118 | 117 | 119 | 83  | 88  |
| 2002 | 68  | 109 | 104 | 46  | 45  | 13  | 74  | 96  | 117 | 126 | 130 | 57  |
| 2003 | 45  | 90  | 97  | 121 | 118 | 189 | 188 | 215 | 178 | 197 | 169 | 180 |
| 2004 | 158 | 128 | 136 | 112 | 108 | 172 | 212 | 184 | 111 | 126 | 58  | 142 |
| 2005 | 138 | 105 | 146 | 121 | 131 | 120 | 96  | 98  | 125 | 89  | 105 | 103 |
| 2006 | 71  | 68  | 73  | 70  | 78  | 78  | 129 | 83  | 109 | 117 | 113 | 116 |
| 2007 | 75  | 85  | 68  | 66  | 71  | 81  | 90  | 76  | 80  | 20  | 49  | 67  |
| 2008 | 80  | 67  | 56  | 29  | 69  | 78  | 54  | 70  | 64  | 70  | 88  | 115 |
| 2009 | 130 | 99  | 118 | 63  | 111 | 110 | 147 | 80  | 53  | 10  | 47  | 56  |
| 2010 | 9   | 46  | 6   | 2   | 4   | 4   | 4   | 4   | 15  | 40  | 49  | 54  |
| 2011 | 53  | 90  | 109 | 102 | 58  | 73  | 171 | 98  | 95  | 122 | 98  | 102 |
| 2012 | 16  | 63  | 85  | 138 | 38  | 13  | 110 | 86  | 104 | 79  | 109 | 145 |
| 2013 | 159 | 91  | 83  | 84  | 104 | 139 | 125 | 94  | 86  | 77  | 90  | 134 |
| 2014 | 109 | 85  | 71  | 126 | 103 | 132 | 104 | 63  | 36  | 55  | 36  | 10  |
| 2015 | 58  | 31  | 35  | 92  | 86  | 58  | 102 | 124 | 90  | 114 | 63  | 61  |
| 2016 | 64  | 74  | 52  | 95  | 148 | 111 | 150 | 145 | 120 | 89  | 85  | 135 |
| 2017 | 119 | 94  | 50  | 125 | 134 | 143 | 139 | 147 | 125 | 101 | 114 | 52  |
| 2018 | 46  | 23  | 66  | 62  | 78  | 89  | 85  | 59  | 42  | 51  | 0   | 47  |
| 2019 | 41  | 45  | 49  | 59  | 70  | 105 | 83  | 53  | 20  | 46  | 44  | 34  |

271

272

273

274 **Table S3.** The mean absolute percentage error (MAPE) values between the trend value derived  
 275 from the full dataset and sampled trends are reported, based on quantile regression and free  
 276 tropospheric observations (700-300 hPa) above Frankfurt and Africa. Sampled trends are  
 277 generated by one thousand random samples for each of a predetermined number of profiles per  
 278 month.

| #profiles per month | 1    | 2    | 3    | 4    | 5    | 6    | 7    | 8    | 9    | 10   |
|---------------------|------|------|------|------|------|------|------|------|------|------|
| Frankfurt           | 69.1 | 39.3 | 28.1 | 18.0 | 16.7 | 15.3 | 14.3 | 12.4 | 11.7 | 9.1  |
| Africa              | 93.9 | 85.0 | 79.6 | 71.9 | 64.3 | 55.2 | 54.9 | 53.1 | 50.1 | 48.9 |
| #profiles per month | 11   | 12   | 13   | 14   | 15   | 16   | 17   | 18   | 19   | 20   |
| Frankfurt           | 9.0  | 8.7  | 8.3  | 7.6  | 7.2  | 5.9  | 5.6  | 5.2  | 4.8  | 3.9  |
| Africa              | 47.8 | 46.4 | 42.3 | 40.5 | 38.9 | 34.0 | 31.6 | 26.4 | 26.0 | 23.2 |

279

280

281 **Table S4. Summary of the TCO trends in nmol mol<sup>-1</sup> decade<sup>-1</sup> from IAGOS**

282 The sampling column reports three numbers for the in situ data: i) the number on the top refers to  
 283 the average number of profiles per months taking into account all the months with profiles, ii)  
 284 the number in the middle refers to the percentage of months with data for the studied time-period  
 285 (1994-2019 or 2004-2019), iii) the number in the bottom refers to the total number of profiles for  
 286 the studied time period (1994-2019 or 2004-2019). We provide these numbers for a reference,  
 287 but, for these three IAGOS regions, our final conclusions are based on the confidence scale for  
 288 the fused (IAGOS + SHADOZ) results (See Table 1 in the main manuscript).

289

|       |                        | 1994-2019                                                      |             |                       | 2004-2019                                                      |             |                       |
|-------|------------------------|----------------------------------------------------------------|-------------|-----------------------|----------------------------------------------------------------|-------------|-----------------------|
|       |                        | Trends±2σ<br>(nmol mol <sup>-1</sup><br>decade <sup>-1</sup> ) | p-<br>value | Sampli<br>ng          | Trends±2σ<br>(nmol mol <sup>-1</sup><br>decade <sup>-1</sup> ) | p-<br>value | Sampli<br>ng          |
| IAGOS | Americas               | 2.07±0.51                                                      | <0.01       | 10.8<br>71.5%<br>2403 | 0.64±1.21                                                      | 0.29        | 9.8<br>66.1%<br>1248  |
|       | Southeast Asia         | 4.66±0.46                                                      | <0.01       | 15.3<br>62.7%<br>2194 | 4.07±1.60                                                      | <0.01       | 16.2<br>61.1%<br>1423 |
|       | Malaysia/Indon<br>esia | 6.44±1.13                                                      | <0.01       | 8.0<br>44.4%<br>636   | 8.62±2.29                                                      | <0.01       | 9.3<br>47.2%<br>475   |

290

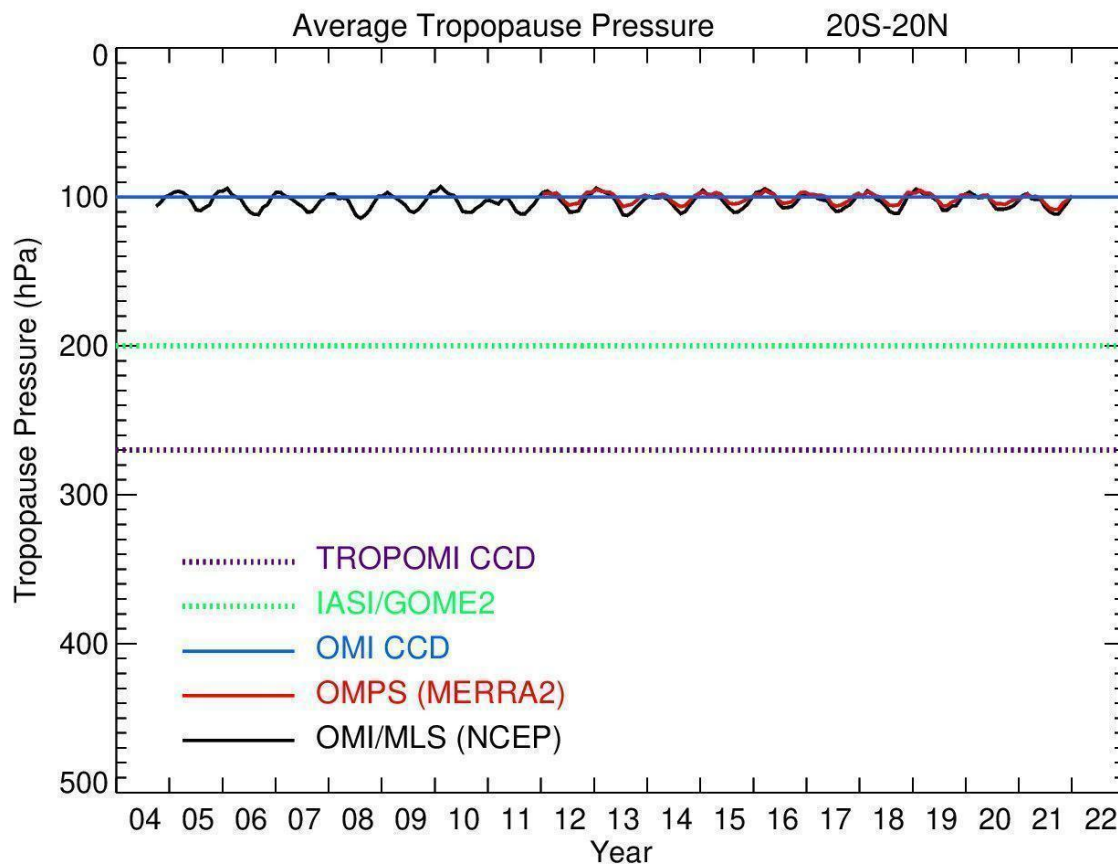

291

292 **Figure S1.** Time series of the monthly mean of the tropopause pressure level used to define the  
 293 tropical tropospheric column ozone (TTCO) with satellite data.

294

295

296

297

298

299

300

301

302

### Sampling distribution of median trends (IAGOS Africa)

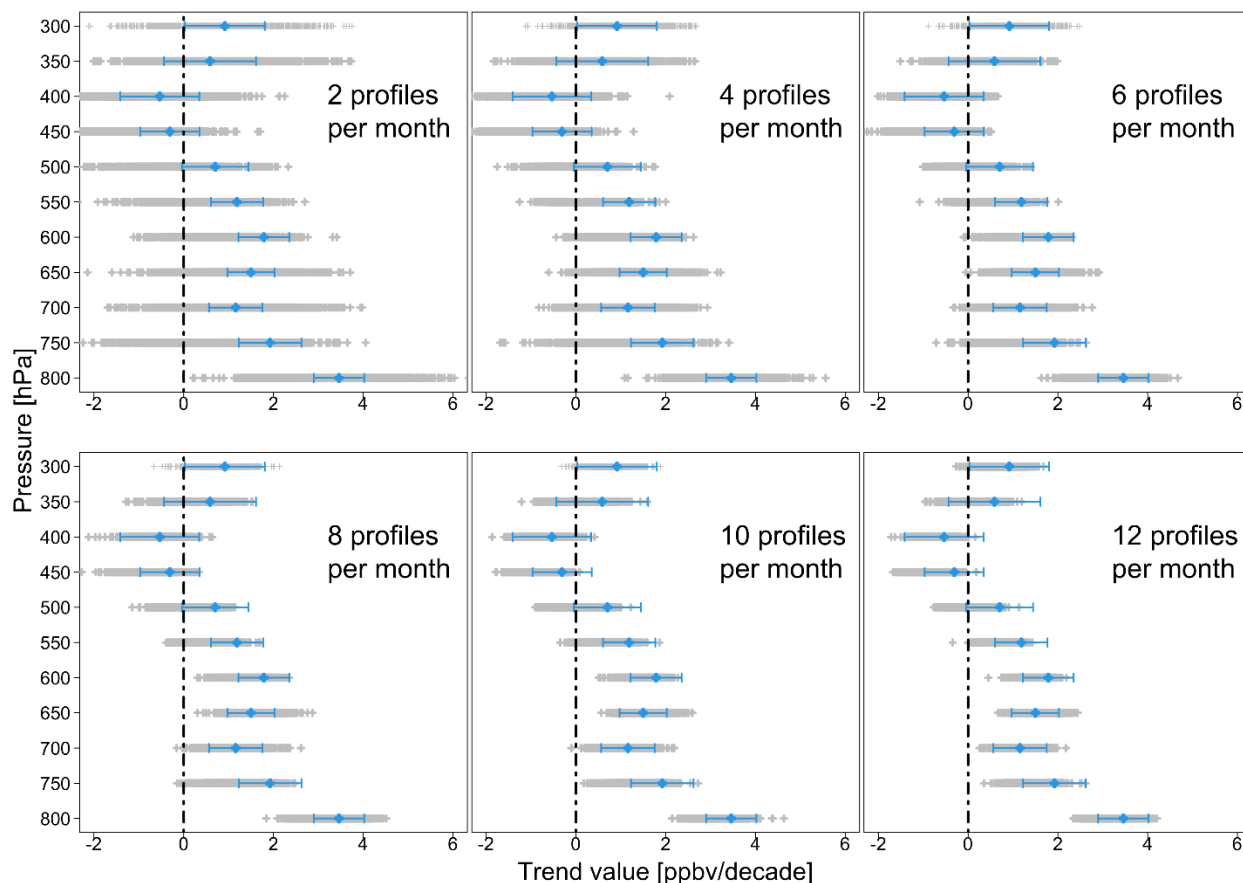

303

304 **Figure S2.** Sampling distributions of trends for a sampling frequency of 2 to 12 profile-per-  
305 month above Africa. The estimation is based on quantile regression. Blue diamonds are the  
306 median trend estimates derived from all available data, the horizontal blue bars indicate the 95%  
307 confidence interval of the trend with full sampling, each gray cross represents the estimate  
308 produced by a random sampling from 1000 iterations.

309



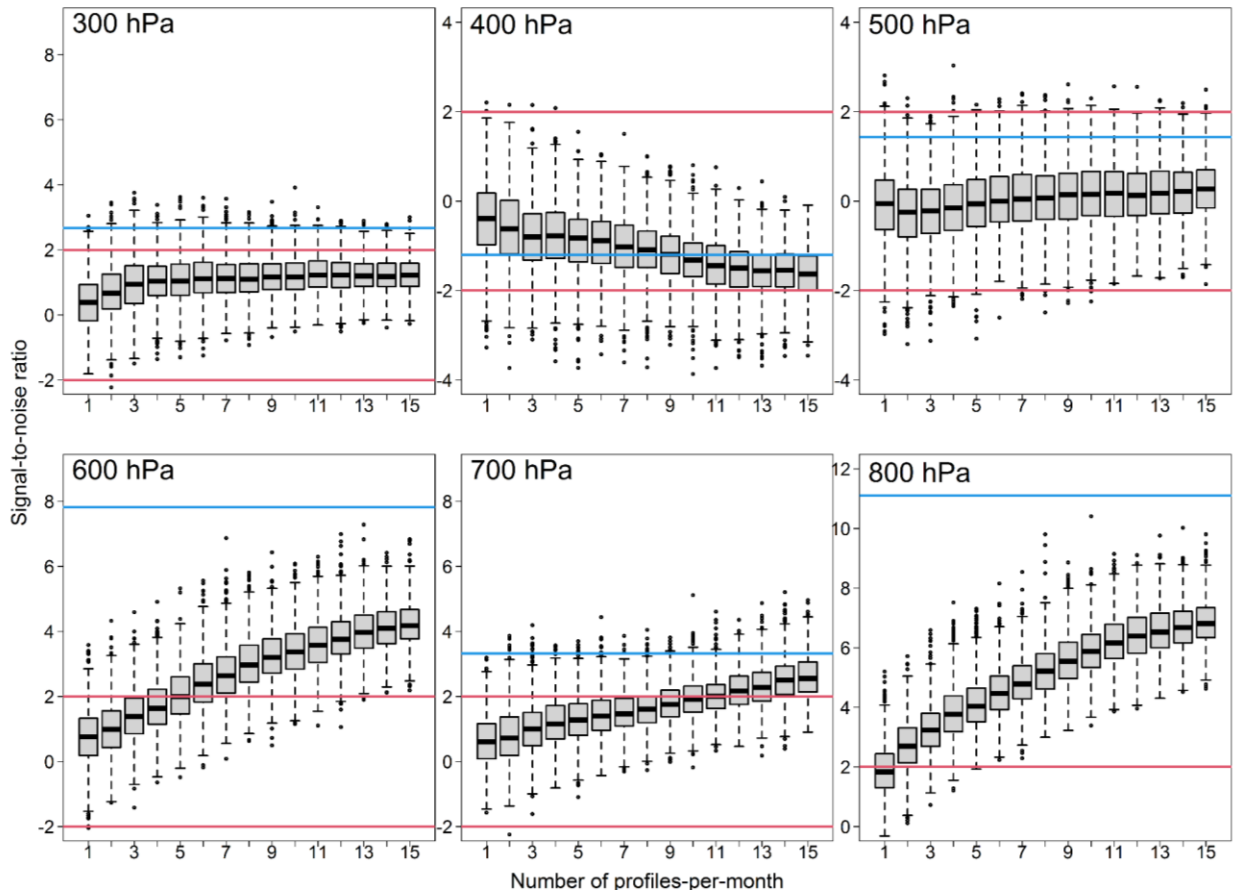

310

311 **Figure S3.** Sampled signal-to-noise ratios of the ozone trends. The ratios vary with different  
 312 sampling frequencies at 800 to 300 hPa above Africa. Red lines (at signal-to-noise ratios of 2 and  
 313 -2) represent the conventional trend detection threshold (i.e. 95% confidence level), and blue  
 314 lines represent the SNR derived from all available data.

315

316

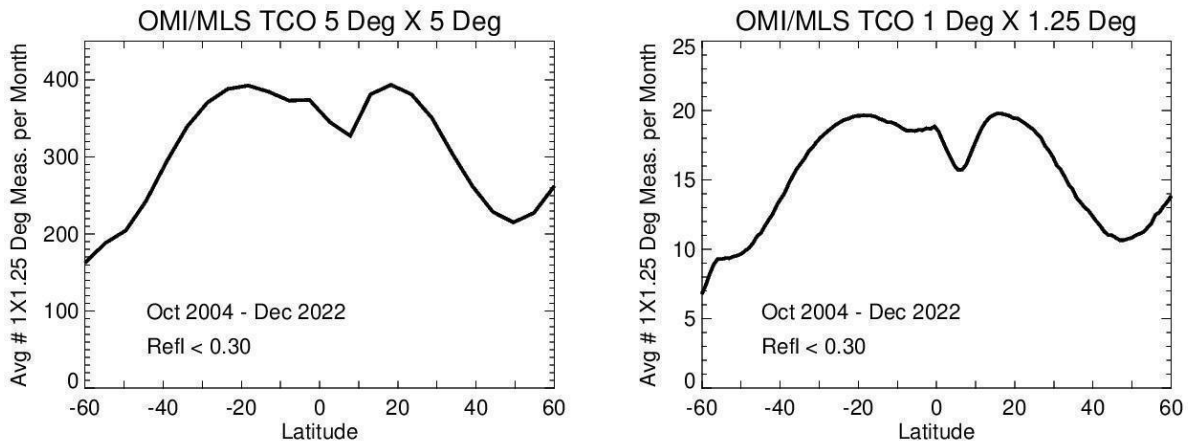

317

318 **Figure S4.** Number of  $1^\circ \times 1.25^\circ$  resolution OMI/MLS tropospheric column ozone  
319 measurements per month in a  $5^\circ \times 5^\circ$  grid cell (left panel) or a  $1^\circ \times 1.25^\circ$  grid cell (right panel), by  
320 latitude. The data have been cloud-filtered using a low reflectivity threshold of  $R < 0.30$ , and the  
321 results are averaged across October 2004 to December 2022.

322  
323  
324  
325

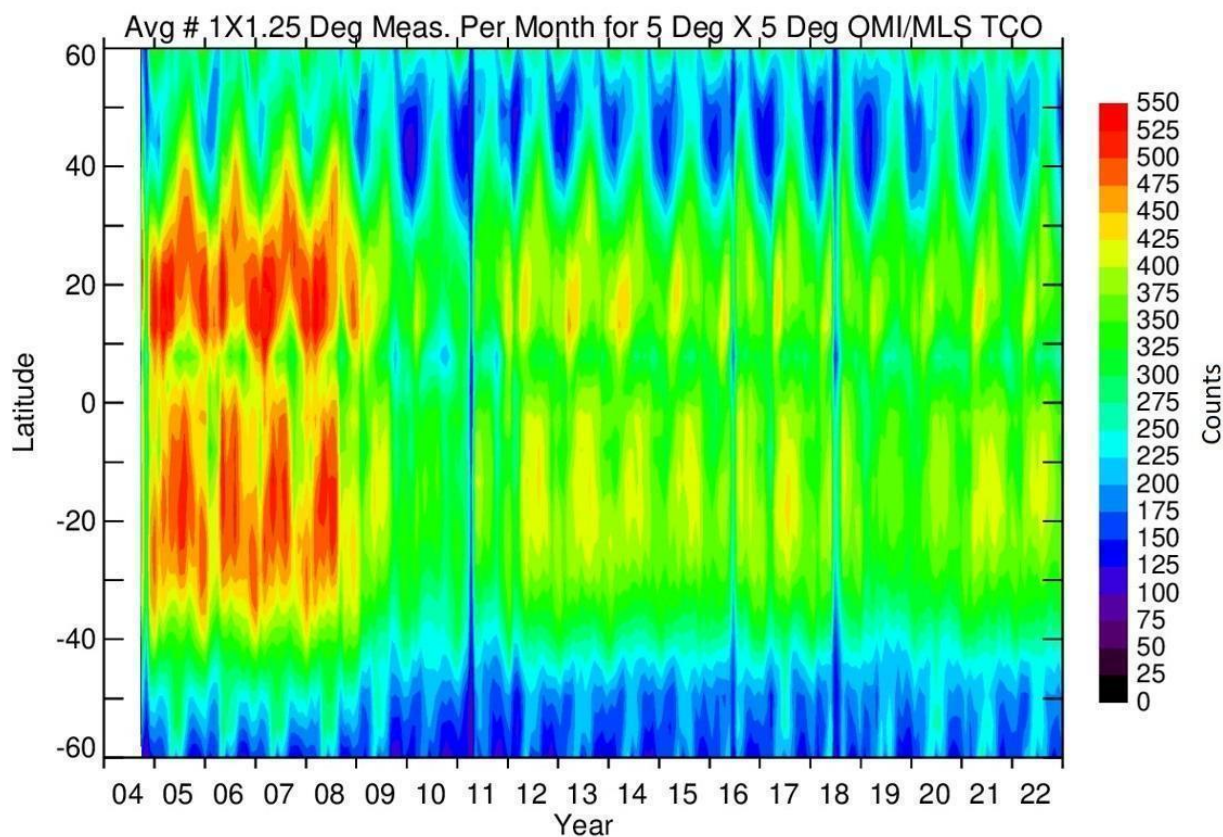

326  
327 **Figure S5.** Hovmoller plot of average number of daily  $1^\circ \times 1.25^\circ$  tropospheric column ozone  
328 (TCO) measurements per month within each  $5^\circ \times 5^\circ$  grid cell, following  $R < 0.30$  cloud filtering.  
329 Starting January 2009 there are fewer measurements due to the row anomaly problem.

330

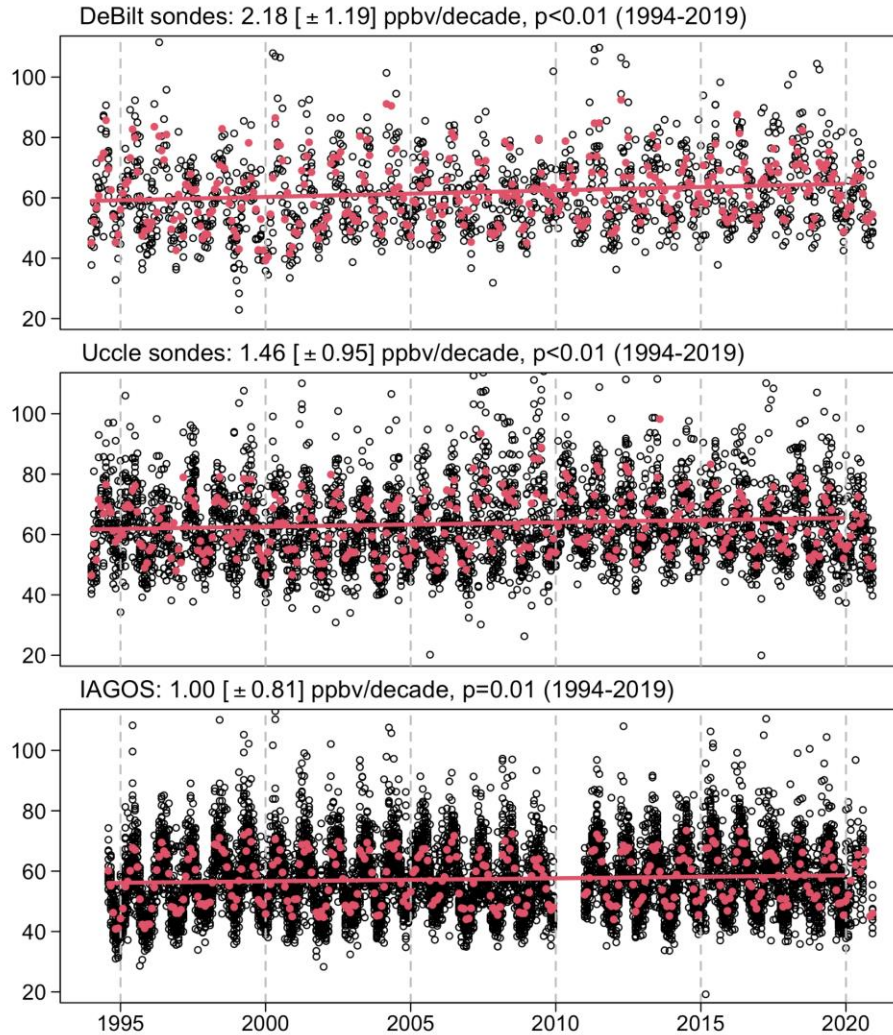

331

332 **Figure S6a.** Mid-tropospheric (700-300 hPa) ozone trends (1994-2019) at three European  
 333 locations: DeBilt, The Netherlands (top), Uccle, Belgium (center) and an ensemble of all IAGOS  
 334 profiles above Europe (bottom). Each black point represents a mid-tropospheric observation  
 335 (averaged over 700-300 hPa) from a single profile, while the red points represent monthly means  
 336 (under the assumption of no measurement uncertainty). Also shown are the linear trends for  
 337 1994-2019, with 95% confidence intervals and  $p$ -values.

338

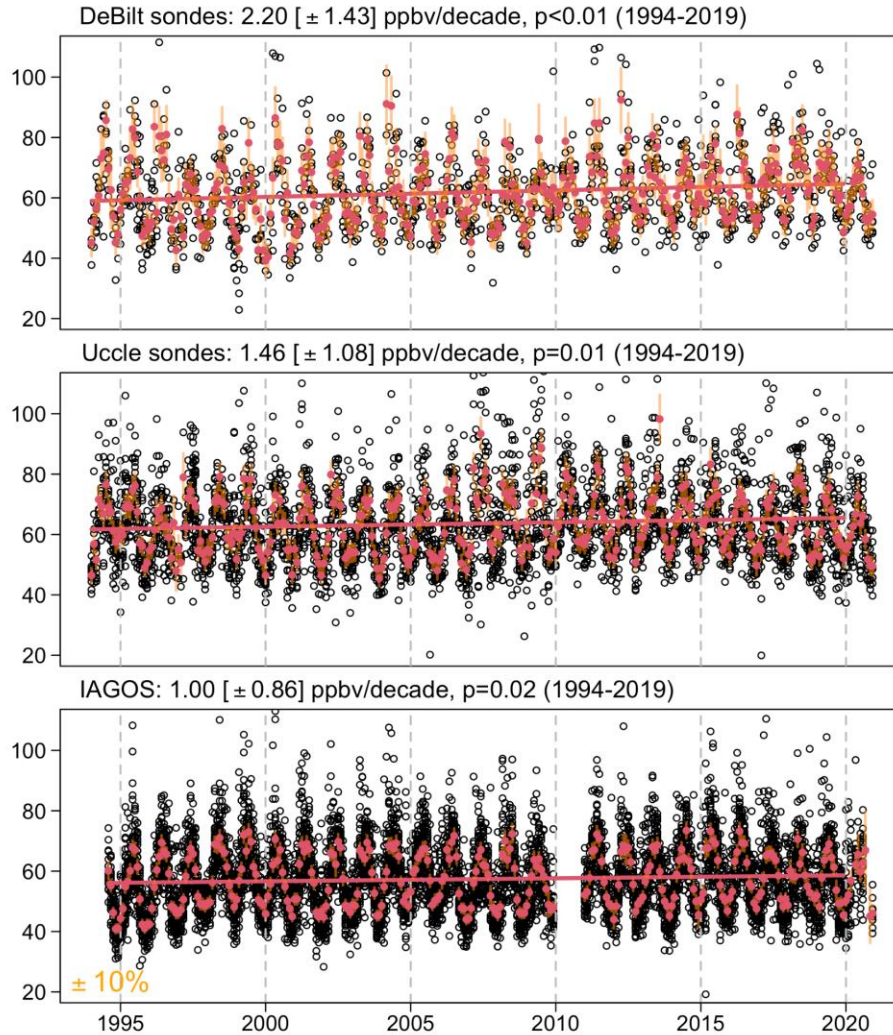

339

340 **Figure S6b.** As in Figure S6a, but with random noise of 10% imposed on each individual ozone  
 341 value (the noise value is randomly selected from a normal distribution with 0 mean and SD as  
 342  $y \cdot 0.10$  (e.g. for a desired uncertainty of  $\pm 10\%$ )). For each month, monthly means are produced  
 343 from the corresponding noise-added observations. This procedure is repeated 10,000 times, and  
 344 the 2.5<sup>th</sup> and 97.5<sup>th</sup> percentiles from the 10,000 noise-added monthly means indicate the 95%  
 345 confidence interval of the means (shown with the orange bars on each monthly mean). Finally,  
 346 10,000 trend values are produced, and the mean and standard deviation become the final trend  
 347 and sigma uncertainty reported in each panel of the figure.

348

349

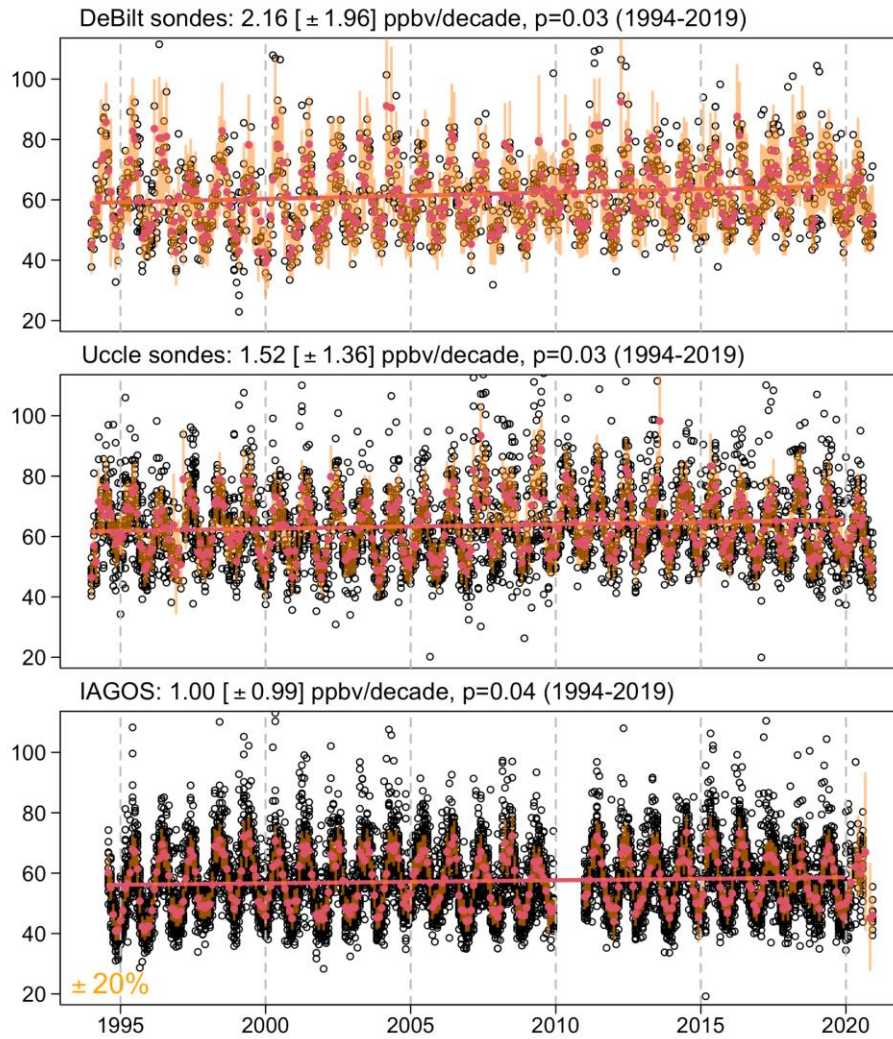

350

351 **Figure S6c.** As in Figure S6b but with 20% random noise imposed on each individual ozone  
 352 value.

353

354

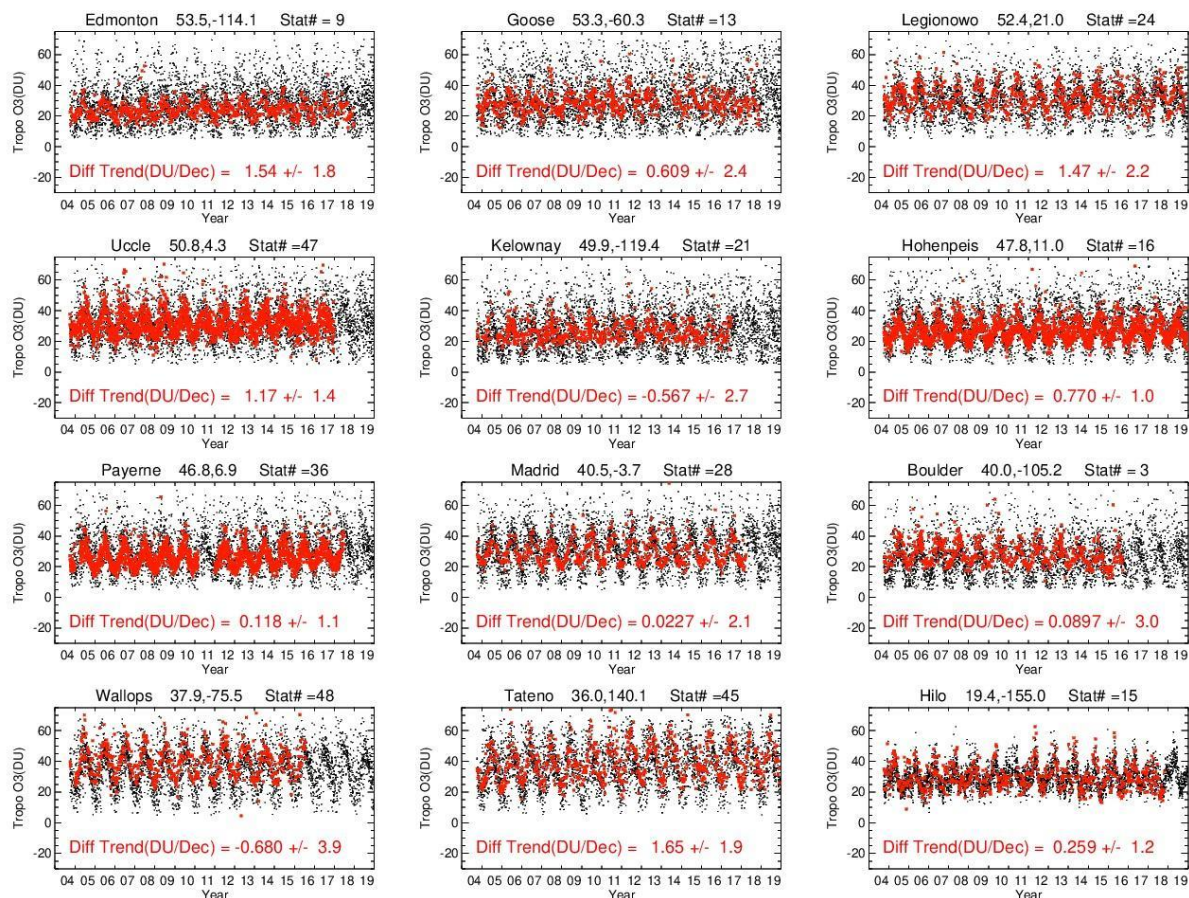

355

356 **Figure S7.** Daily time series of TCO (in DU) for OMI/MLS (black) and ozonesondes (red) for  
 357 2004-2019 from WOUDC and NDACC. Stations were selected (indicated) that exhibited the  
 358 best coverage over the long record. Calculated drift difference of OMI/MLS TCO minus sonde  
 359 TCO in DU decade<sup>-1</sup> are also shown for each site (including 2σ uncertainty). Mean drift  
 360 difference for the combined sites is  $+0.54 \pm 0.64$  DU decade<sup>-1</sup>.

361

362

363

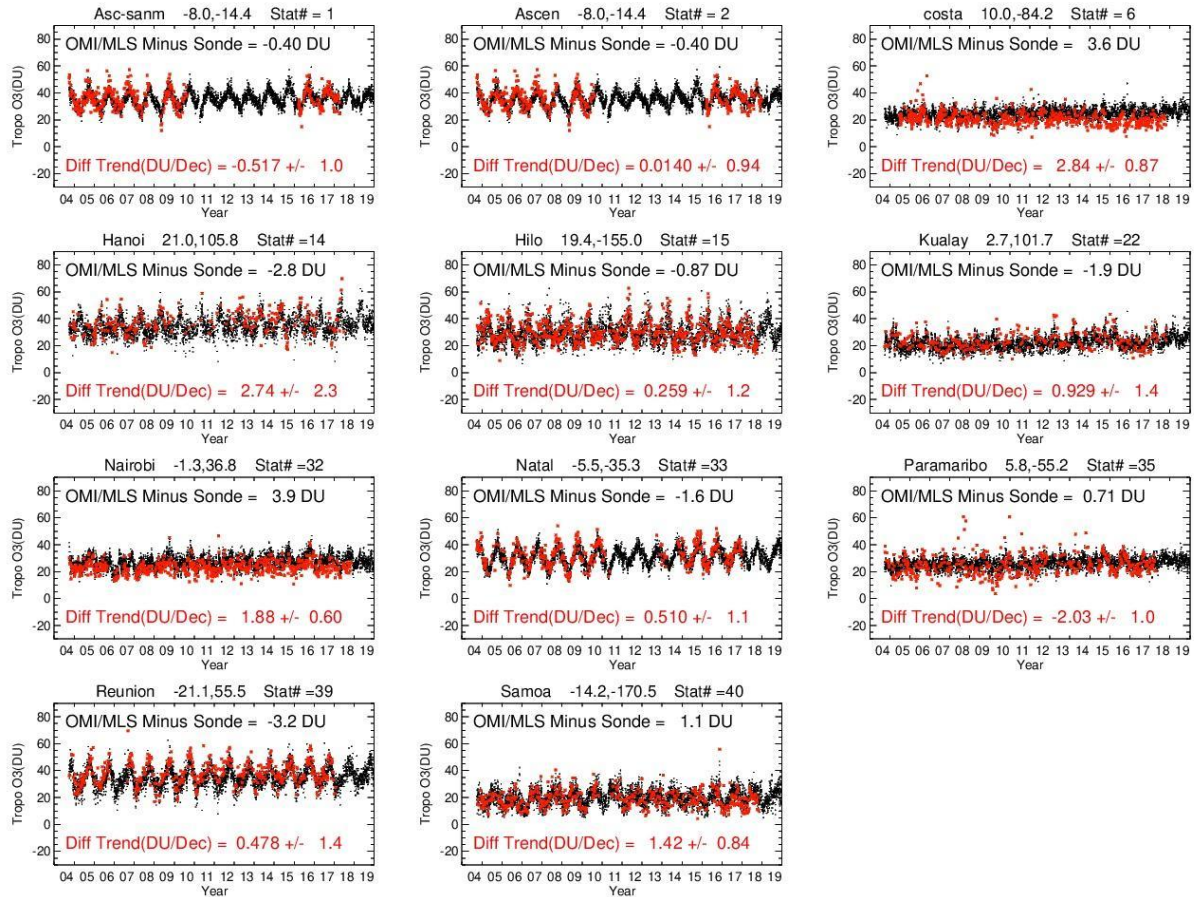

364

365 **Figure S8.** Similar to Figure S4.1, but for the tropics using SHADOZ data. Mean drift  
 366 difference for the combined sites is  $+0.57 \pm 0.40$  DU decade<sup>-1</sup>.

367

368

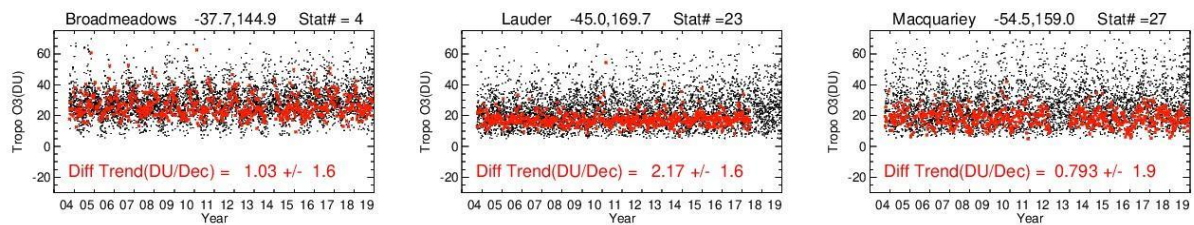

369

370 **Figure S9.** Similar to Figure S7, but for the SH. SH sonde measurement sites are sparse  
 371 compared to the NH and tropics. Mean drift difference for these combined SH sites is  $+1.33 \pm$   
 372  $0.98$  DU decade<sup>-1</sup>.

373

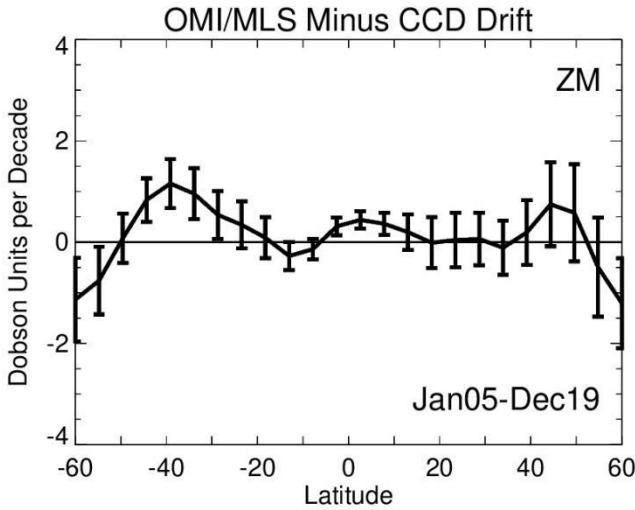

374

375 **Figure S10.** OMI/MLS TCO minus OMI CCD TCO coincident monthly differences (in DU)  
 376 zonally averaged over the Pacific (120°W-120°E). The curve represents line-fits (including  $\pm 2\sigma$   
 377 uncertainties) of monthly OMI/MLS minus CCD differences for 2005-2019.

378

379

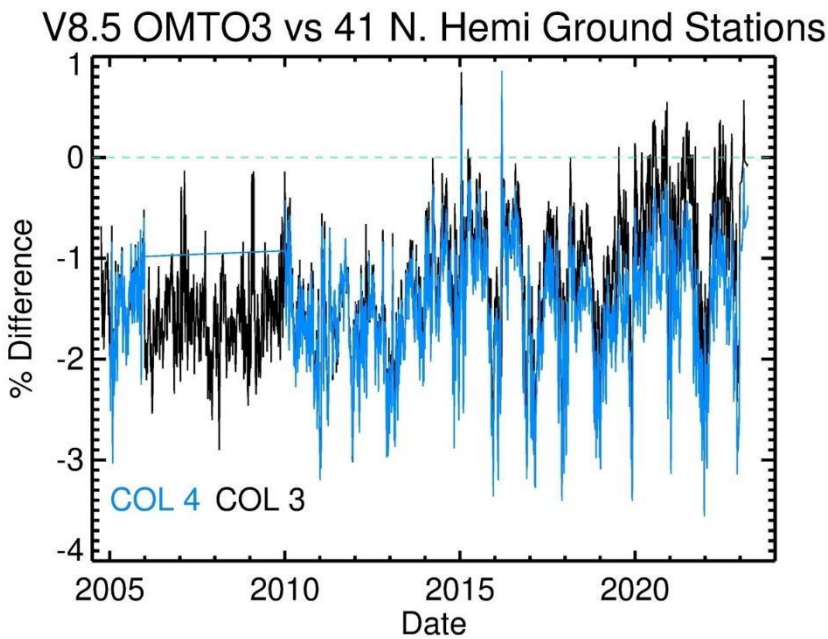

380

381 **Figure S11.** Public domain OMI v8.5 total ozone minus ground-based Dobson/Brewer total  
 382 ozone differences in percent (Gordon Labow, personal communication, 2024). The black curve  
 383 shows differences for v8.5 OMI total ozone using current collection-3 L1B data processing while  
 384 the blue curve shows differences using OMI total ozone processed using a preliminary  
 385 collection-4 L1b dataset. The collection-4 processing tends to reduce drift and other anomalies in



386 OMI total ozone and is work in progress. The black curve corresponds to the data that is  
387 currently used for the OMI/MLS TCO and shows obvious long-term drift changes going from  
388 about -1.5% to -0.5% over the almost 20-year record. We conclude from Figure S11 that the  
389 OMI total ozone has a positive drift of about +1% (or +3 DU) over the long record. This is the  
390 drift error in OMI total ozone inferred from the ground measurements, prior to any adjustments  
391 made for the OMI/MLS TCO.

392

393

394

395

396

397

398

399

400

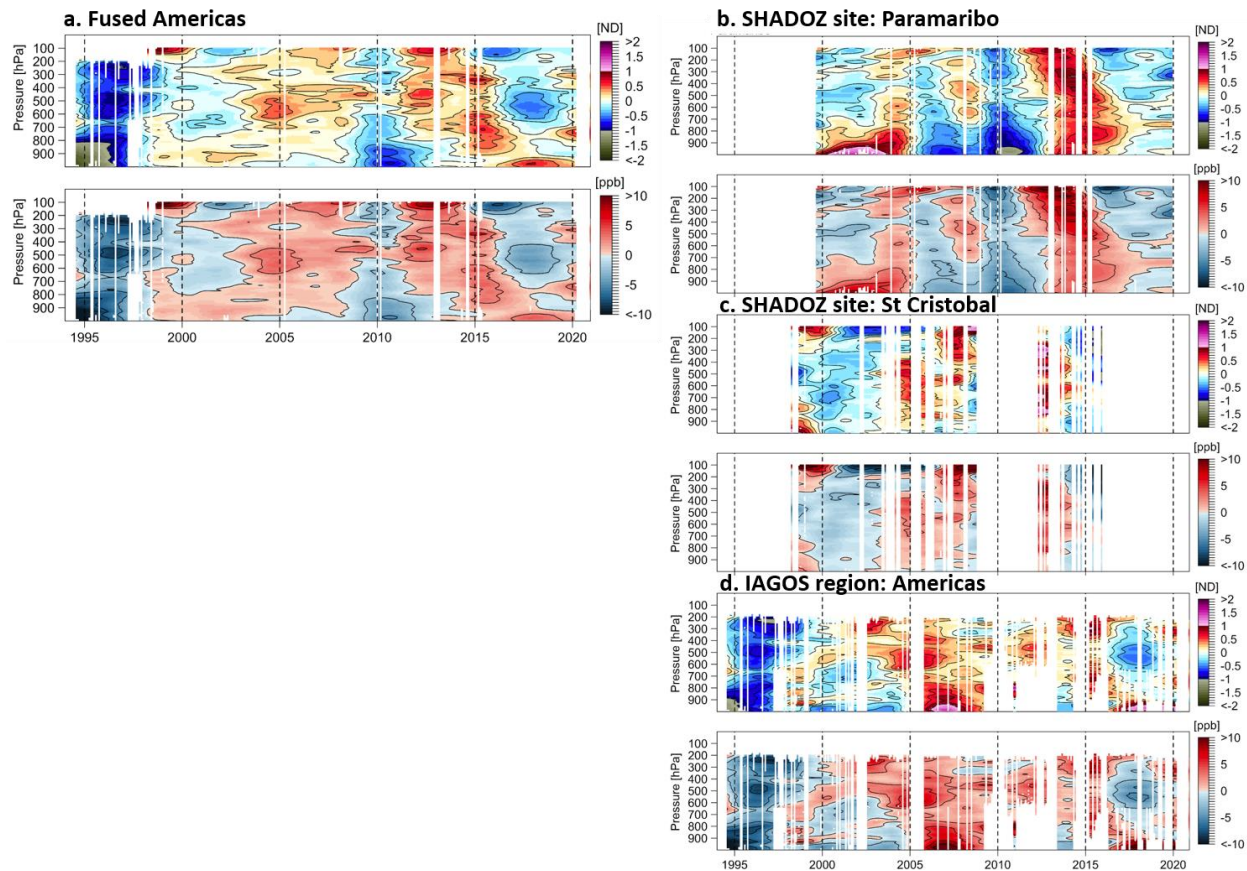

401 **Figure S12.** Ozone mean distributions above Americas based on normalized deviation (ND).  
 402 Panels show the results of the fused data set from IAGOS and SHADOZ (a), and for the  
 403 SHADOZ individual sites (Paramaribo and San Cristobal, panels b and c) and IAGOS region  
 404 (Americas, panel d).  
 405  
 406

407  
 408  
 409  
 410  
 411  
 412

413  
 414

415

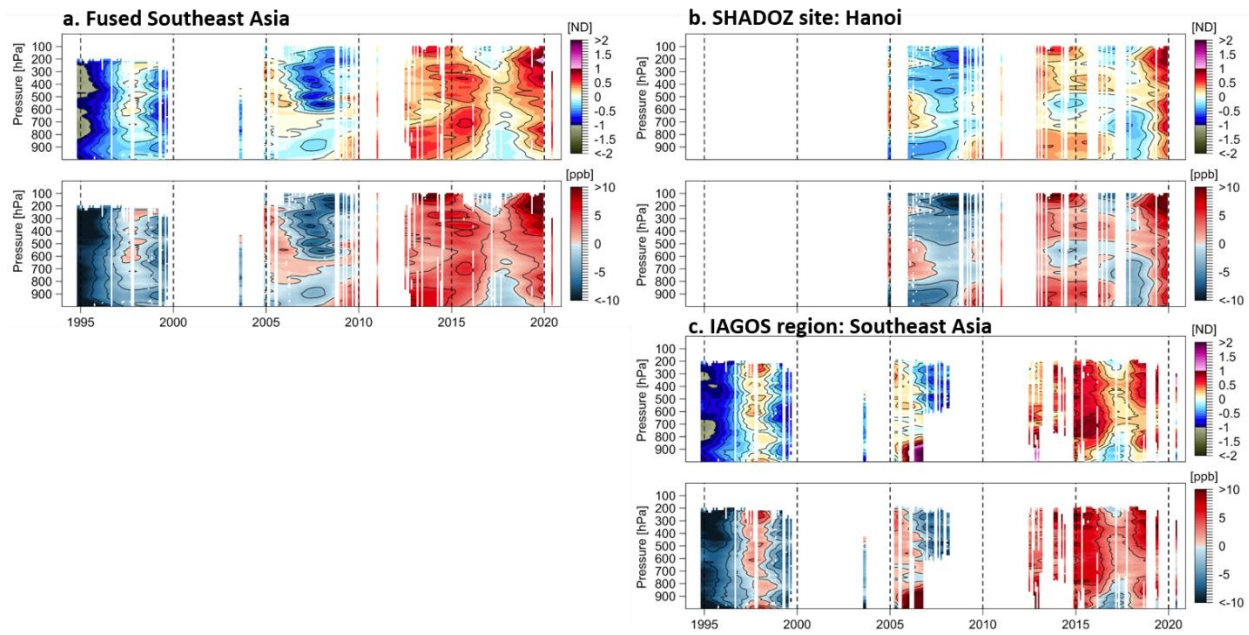

416

417

**Figure S13.** Same as Figure S12 but above Southeast Asia. The SHADOZ individual site used for the fused data is Hanoi.

418

419

420

421

422

423

424

425

426

427

428

429

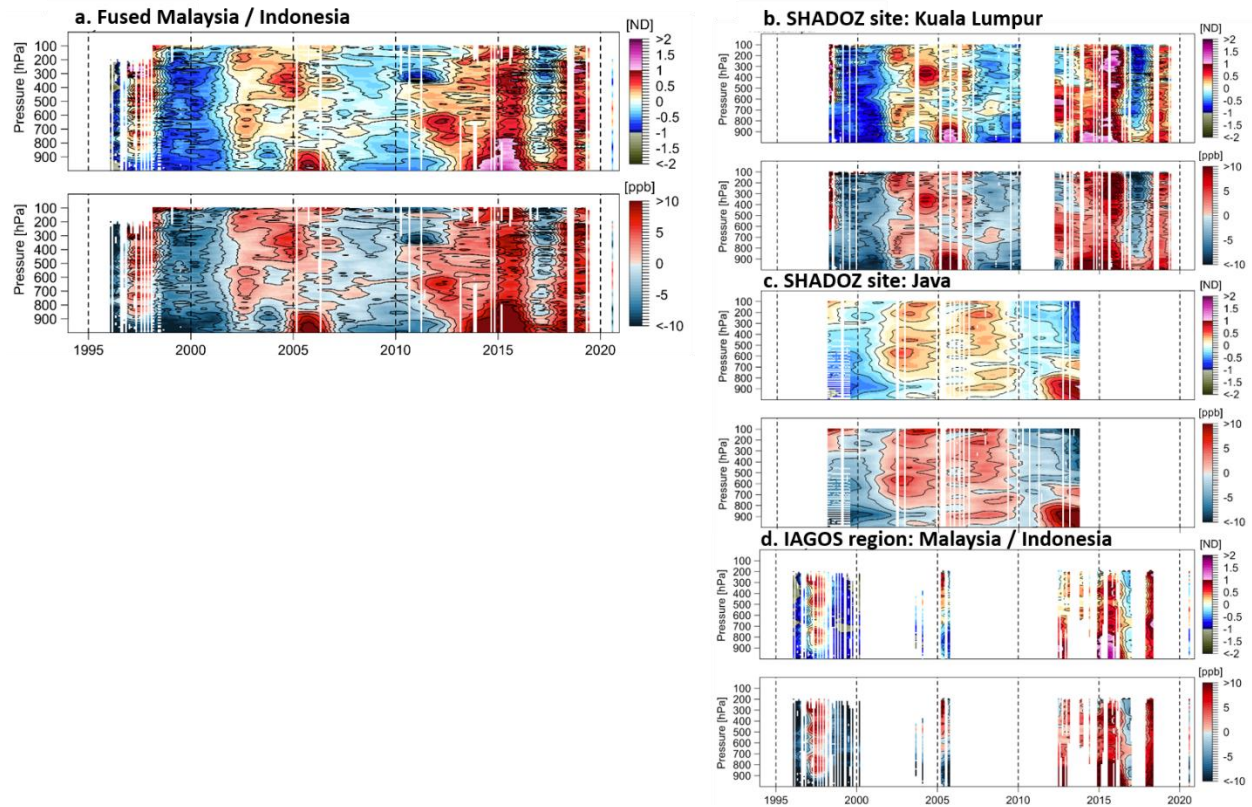

430  
 431 **Figure S14.** Same as Figure S12 but above Malaysia/Indonesia. The SHADOZ individual site  
 432 used for the fused data is Kuala Lumpur and Watukosek (Java).  
 433  
 434

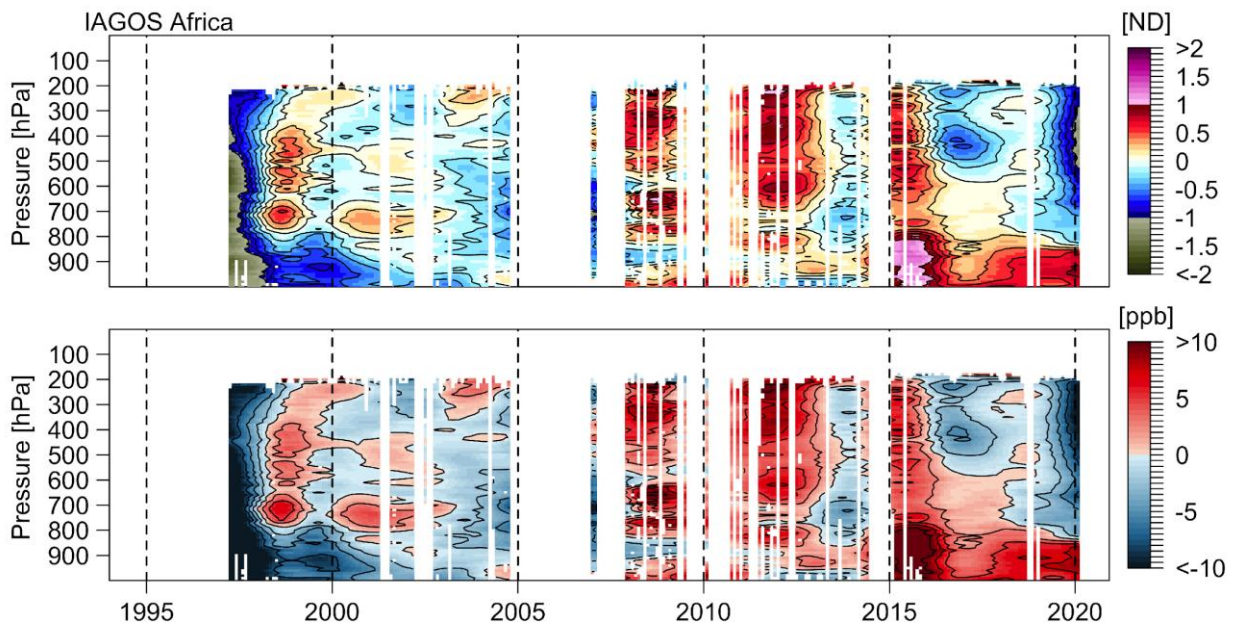

435  
 436 **Figure S15.** Same as Figure S12 but above western Africa. There are no SHADOZ data  
 437 available in this region. We use only IAGOS data.

438

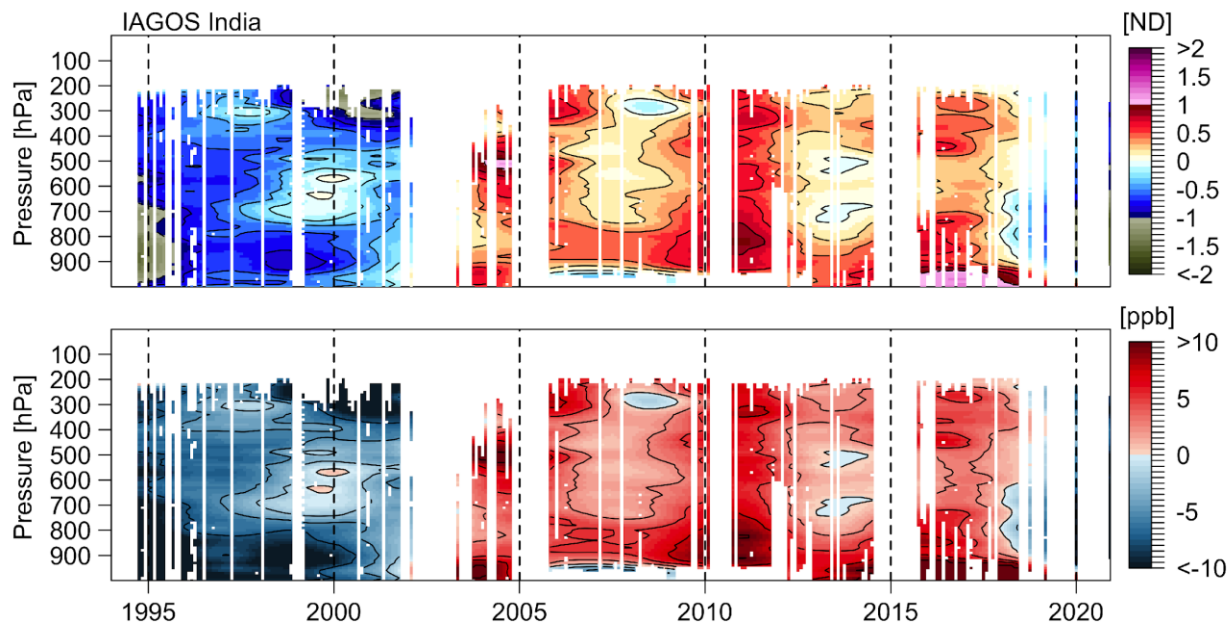

439

440 **Figure S16.** Same as Figure S12 but above India. There are no SHADOZ data available in this  
441 region. We use only IAGOS data.

442

## Median trend distributions (IAGOS)

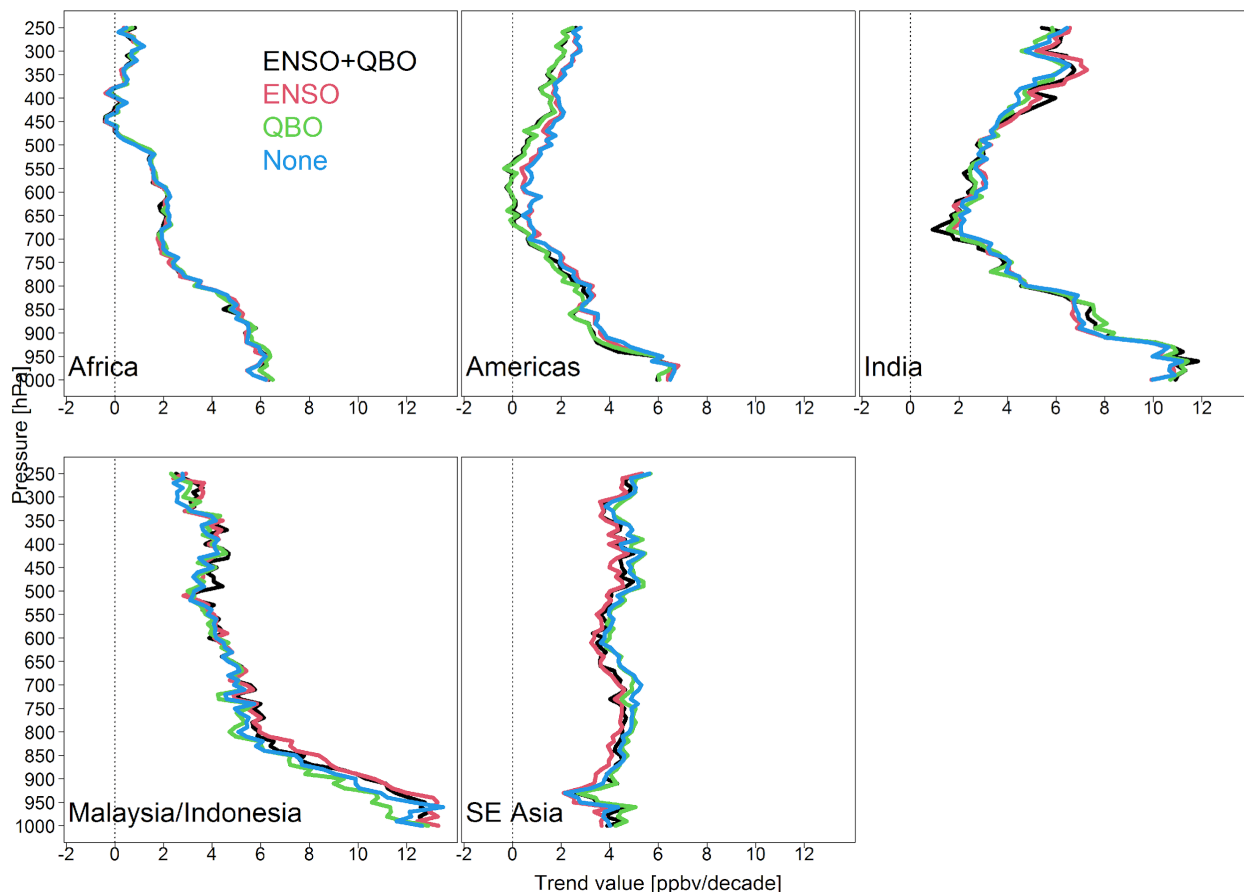

443

444 **Figure S17.** Vertical profiles of ozone trends ( $\text{nmol mol}^{-1}/\text{decade}$ ) from a linear regression that  
445 considers climate variability such as ENSO (El Niño-Southern Oscillation) and QBO (quasi-  
446 biennial oscillation). The trends are reported over the five IAGOS regions: Africa, Americas,  
447 India, Malaysia/Indonesia and Southeast Asia.

448

449

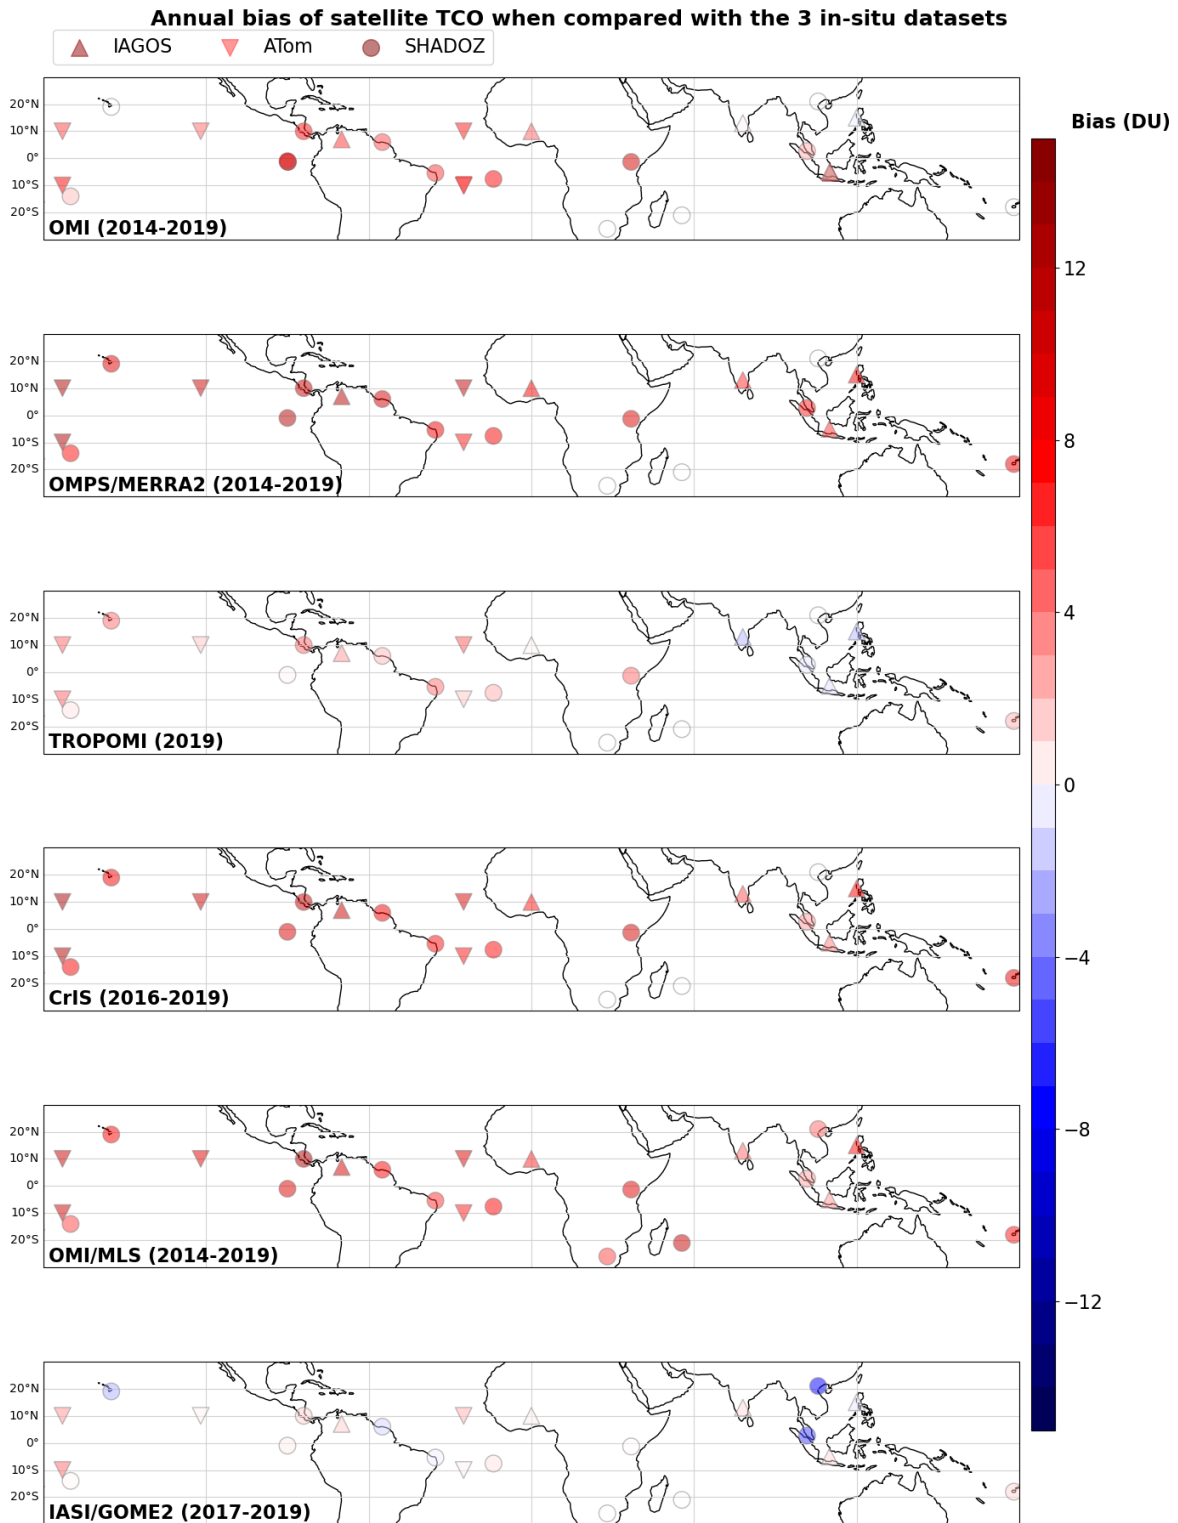

450

451 **Figure S18.** Absolute annual mean biases of tropical tropospheric column ozone (TTCO in DU)  
 452 of the six satellite products: OMI (2014-2019), OMPS/MERRA2 (2014-2019), TROPOMI

453 (2019), CrIS (2018-2019), OMI/MLS (2014-2019) and IASI/GOME2 (2017-2019) against the  
 454 three in situ TCO up to 270 hPa: IAGOS (2014-2019), SHADOZ (2014-2019) and ATom  
 455 (2016-2018).

456  
 457  
 458

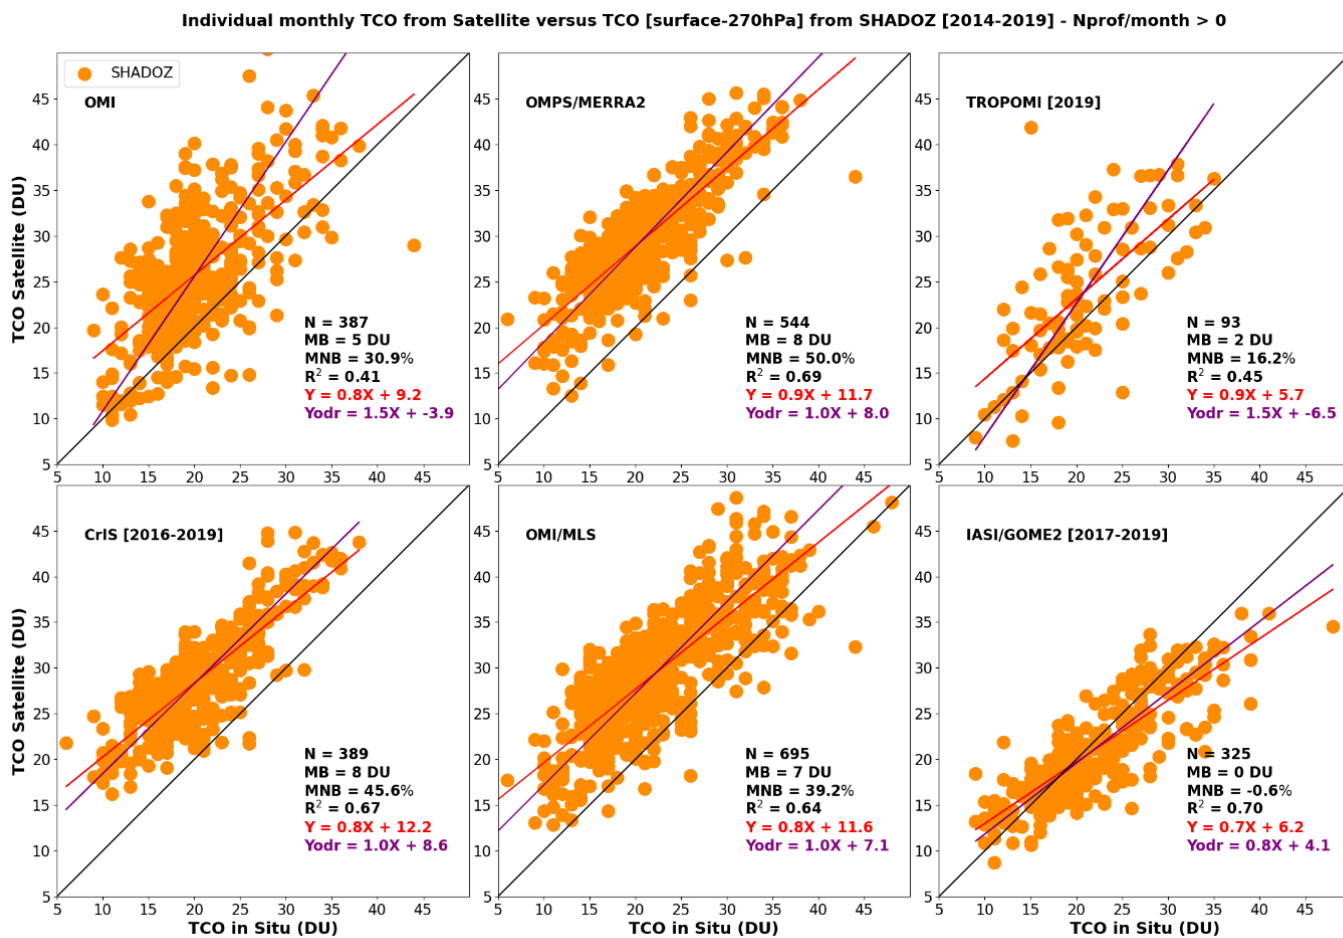

459  
 460  
 461 **Figure S19.** Similar to Figure 5 but the in situ TCO is derived from integrating the column  
 462 up to 270 hPa instead of 100 hPa.  
 463



**Annual bias of satellite TCO when compared with SHADOZ 150 hPa [2014-2019]**

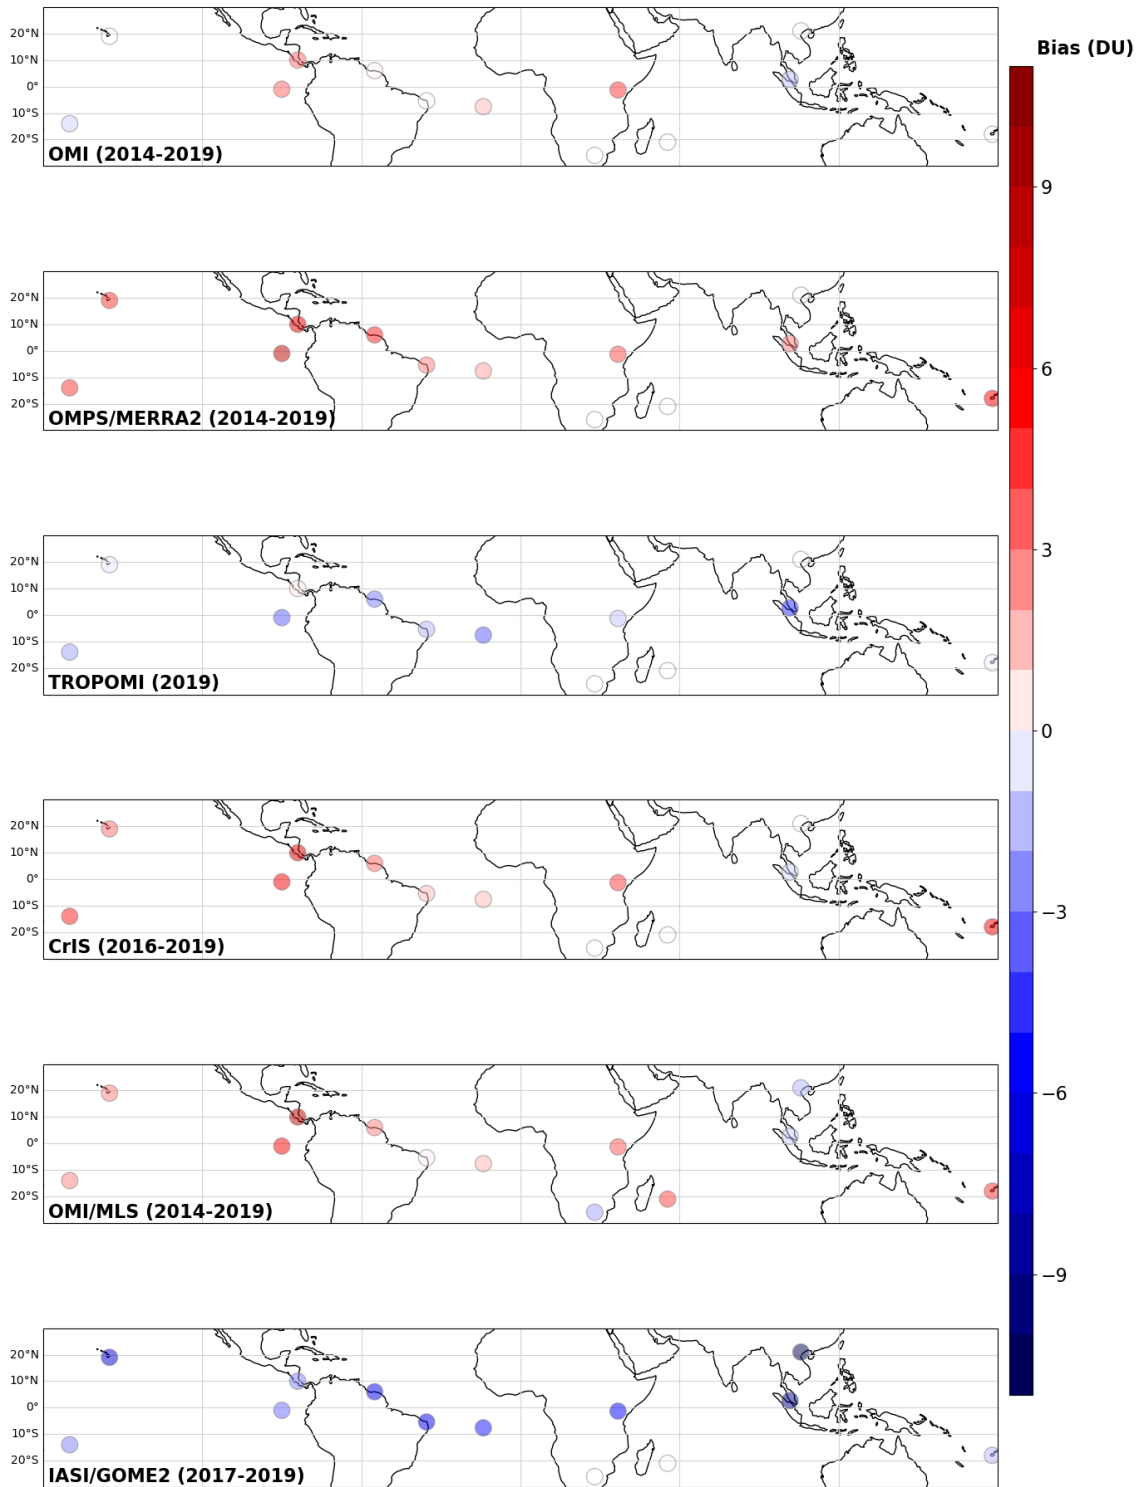

464

465 **Figure S20.** Same as Figure S13 but against SHADOZ only (TTCO up to 150 hPa).

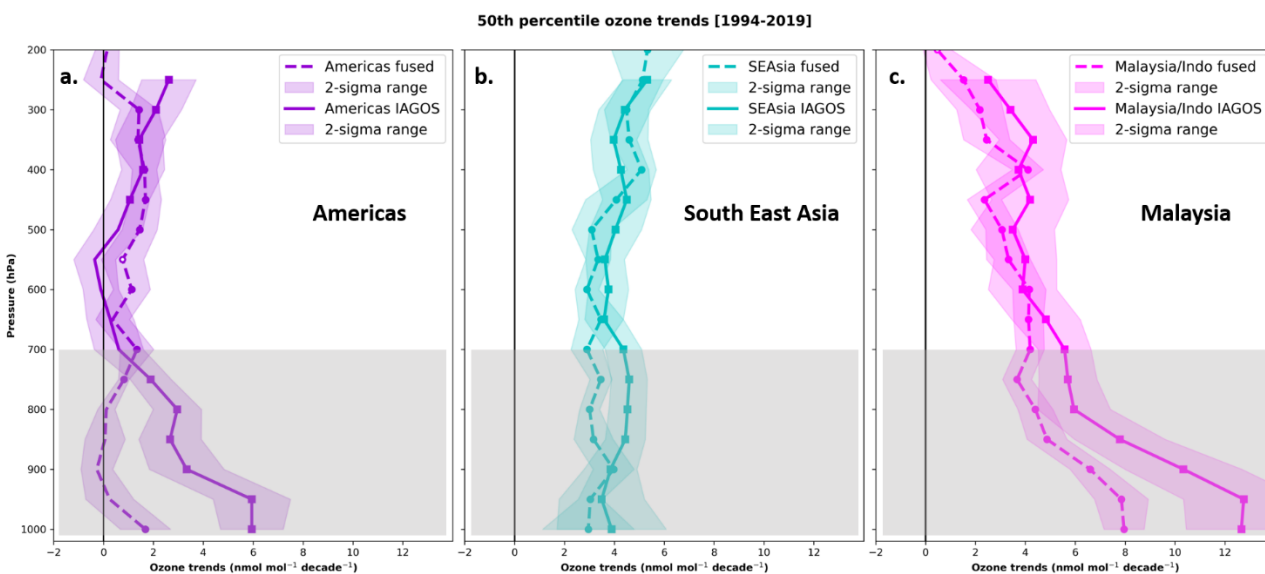467  
468

469 **Figure S21.** Vertical profiles of ozone trends ( $\text{nmol mol}^{-1} \text{decade}^{-1}$ ) between 1994 and 2019, at  
 470 50 hPa vertical resolution. Fused (circles) and IAGOS only (squares) trends are calculated for the  
 471 3 out of the 5 IAGOS regions: Americas (a), Southeast Asia (b) and Malaysia/Indonesia (c) for  
 472 which both IAGOS and SHADOZ data are available. Filled circles and squares indicate trends  
 473 with  $p$ -values less than 0.05. Open circles indicate trends with  $p$ -values between 0.05 and 0.1.  
 474 The zero-trend value is indicated with a vertical black line. The vertical range below 700 hPa is  
 475 shaded grey to indicate that the fused trends are based on several sites and airports influenced by  
 476 different local air masses. The 2-sigma values associated with the ozone trends are shown in  
 477 shaded colors.

478  
479  
480  
481  
482  
483  
484  
485

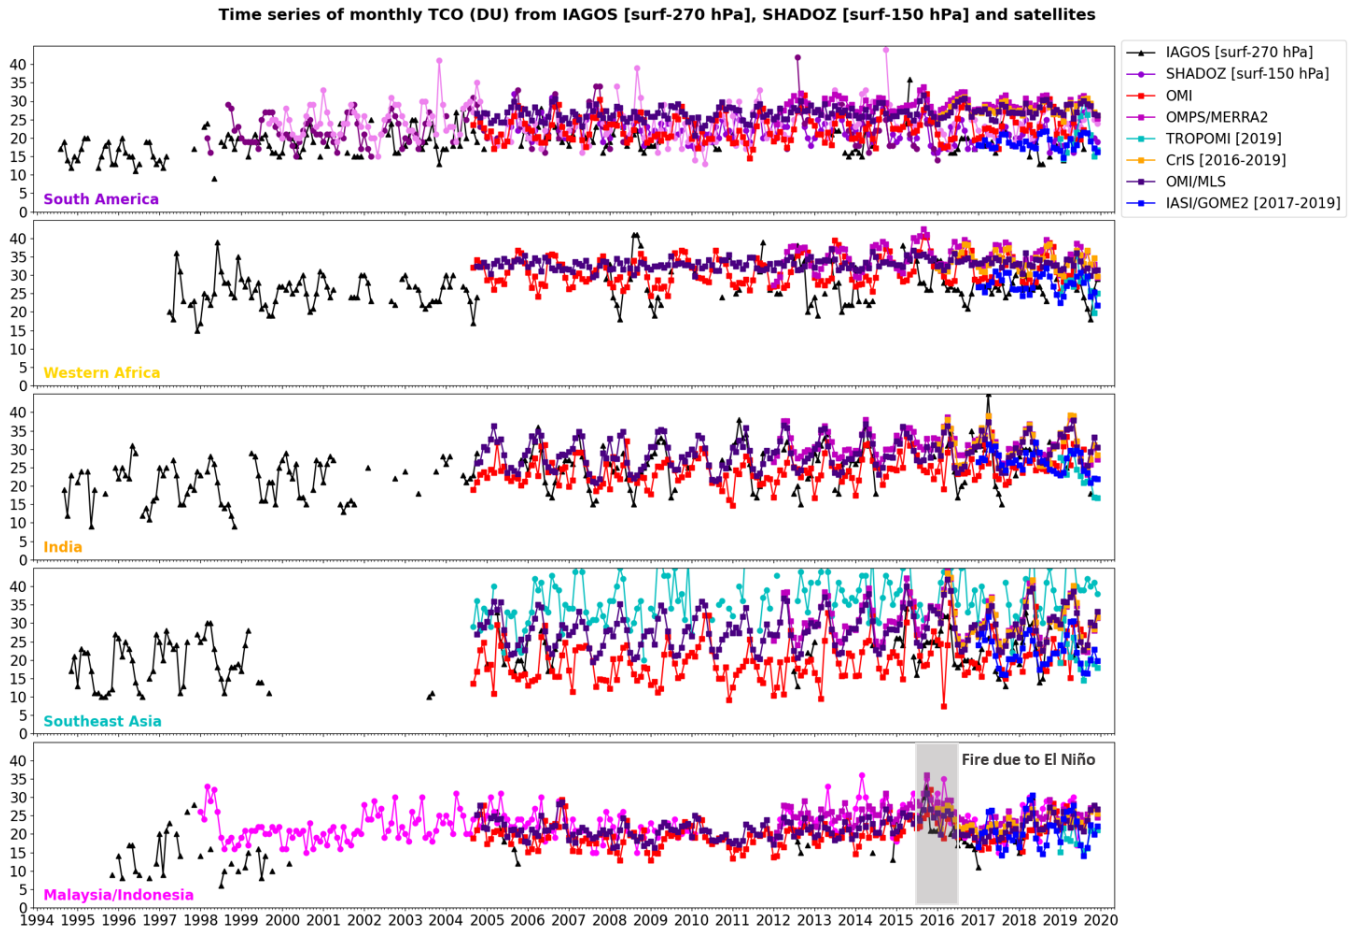

486

487 **Figure S22.** Time series of the monthly tropical tropospheric column ozone (TTCO) from  
 488 IAGOS ozone profiles (TTCO: surface-270 hPa, black line with triangle markers), from  
 489 SHADOZ ozone profiles (TTCO: surface-150hPa, colored lines with circle markers), and  
 490 satellite data (colored line with square markers) extracted above the IAGOS regions. These  
 491 monthly columns are not used to assess the trends reported in Table 1.

492

493

# GFED4 Bb CO –monthly

monthly (1997–2018)

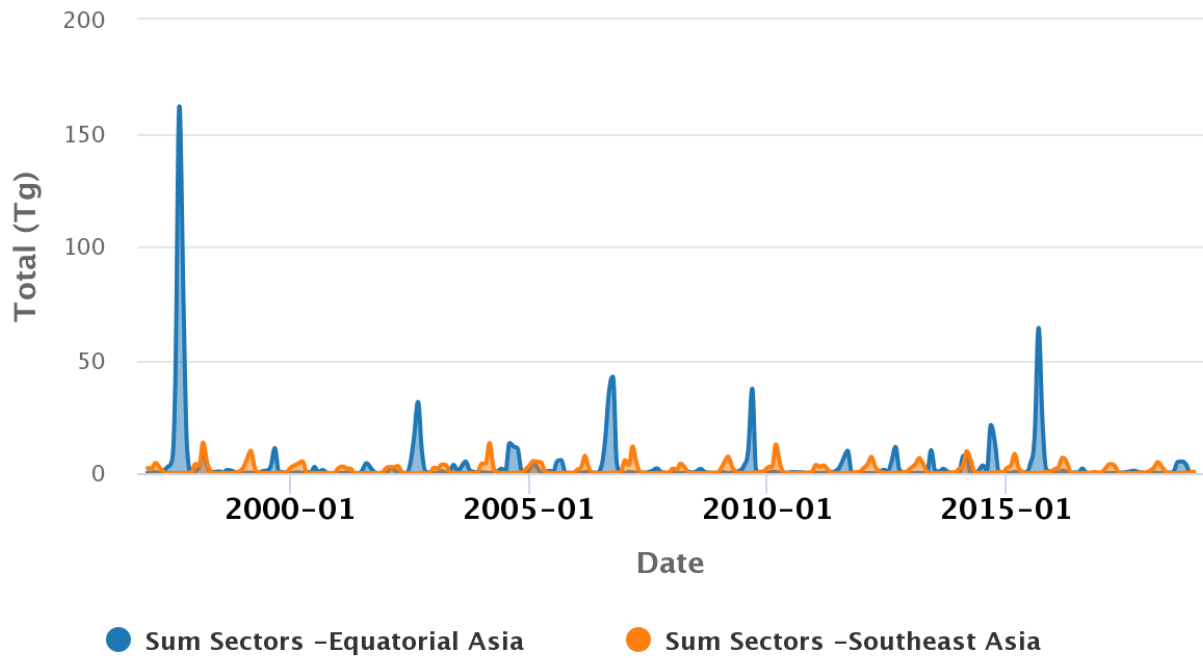

494

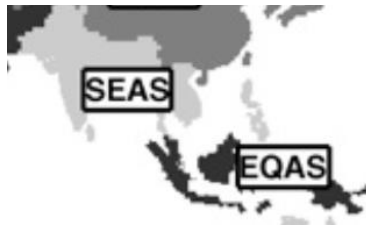

495

496 **Figure S23.** Time series of monthly emissions of CO in Tg due to biomass burning over two  
497 GFED source regions: Equatorial Asia (EQAS) and Southeast Asia (SEAS). *Source: ECCAD*  
498 (<https://eccad.aeris-data.fr/>, Darras et al., 2018)

499

500

501

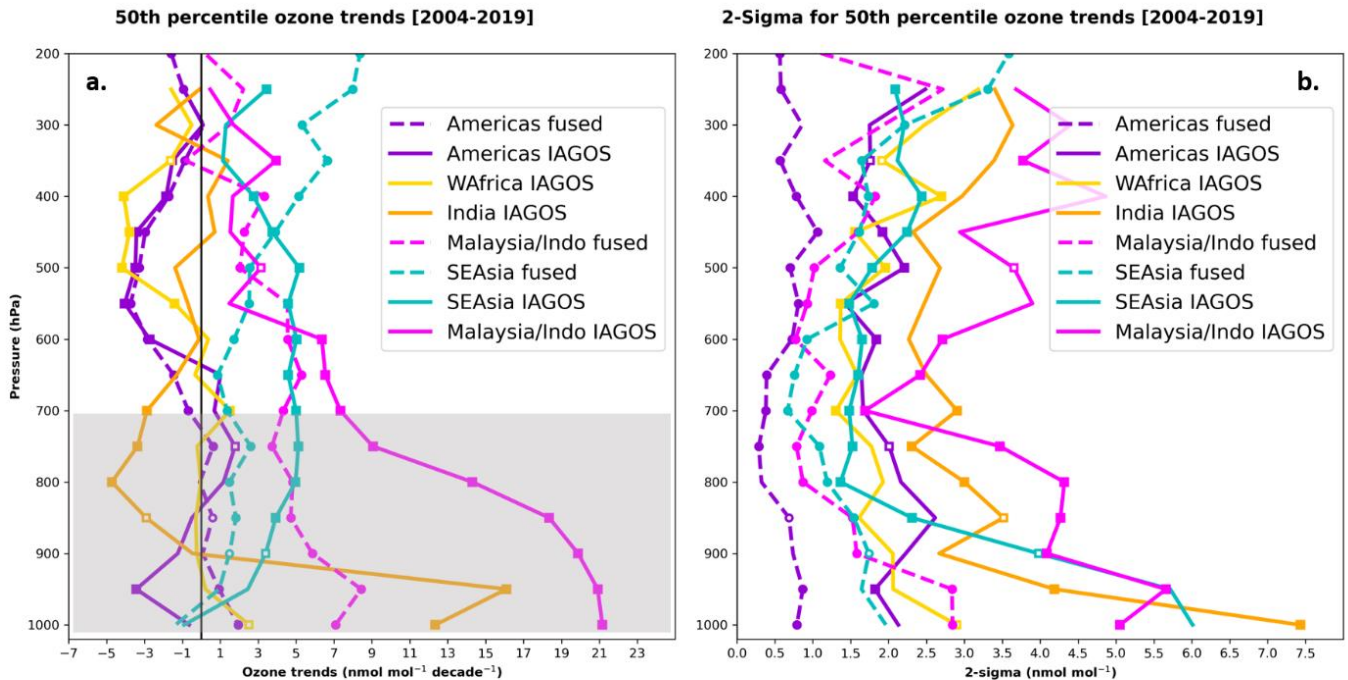

502 **Figures S24.** Vertical profiles of ozone trends ( $\text{nmol mol}^{-1} \text{ decade}^{-1}$ ) (panel a.) and the associated  
 503 uncertainties (2-sigma, panel b.) between 2004 and 2019 with 50 hPa resolution. Trends are  
 504 calculated for the 5 IAGOS regions in the tropics:  
 505 Americas, Western Africa, India, Southeast Asia and Malaysia/Indonesia. SHADOZ data are  
 506 available for 3 out of the 5 IAGOS regions and fused trends (IAGOS + SHADOZ) were  
 507 assessed.  
 508 Squares (IAGOS trends) or circles (fused trends) indicate trends with  $p$  values less than 0.05.  
 509 Open squares or circles indicate trends with  $p$  values between 0.05 and 0.1. The zero-trend value  
 510 is indicated with a vertical black bar. The vertical range below 700 hPa is colored in grey to  
 511 indicate that the fused trends are based on several sites and airports influenced by different local  
 512 air masses.  
 513

514

515

516

Decadal ozone trends for 2004-2019, based on the annual ozone anomaly relative to 2004-2019  
 during months: 1 2 3 4 5 6 7 8 9 10 11 12

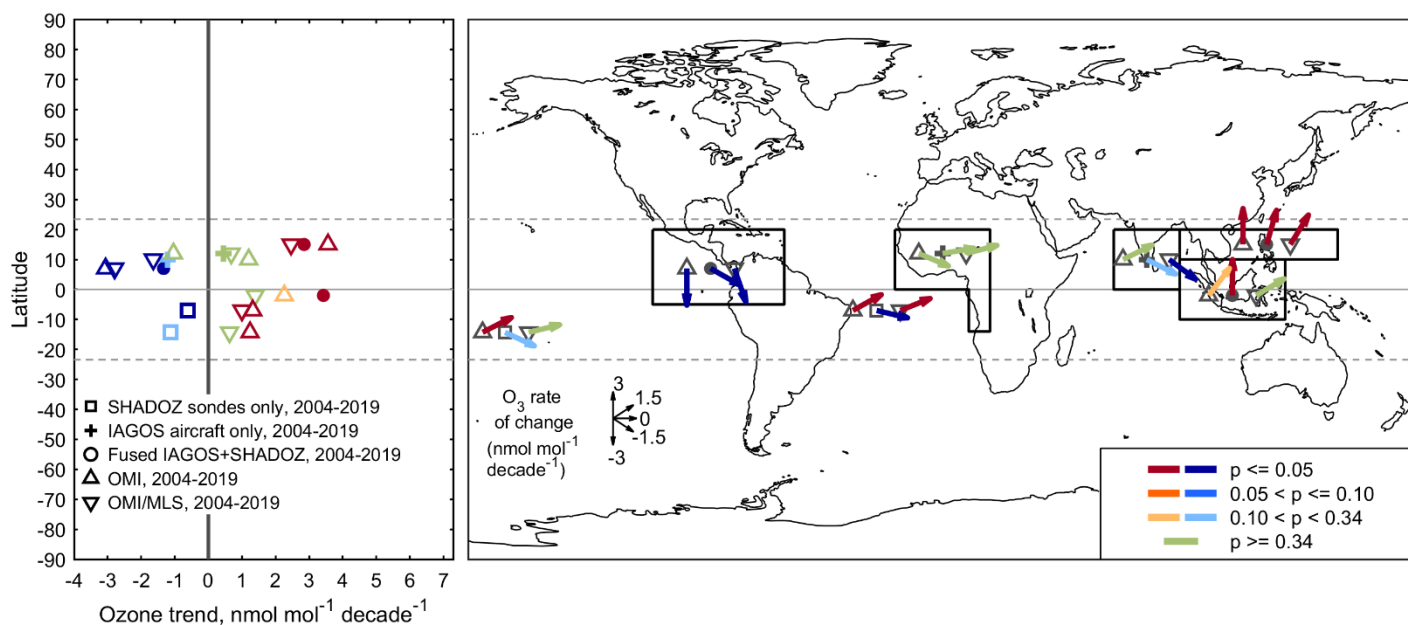

517

518 **Figure S25.** As in Figure 7 but the satellite sample sizes have been greatly reduced so that they  
 519 only coincide with the specific months and grid-cells sampled by the IAGOS aircraft. Trends of  
 520 tropical tropospheric column ozone (TTCO) in  $\text{nmol mol}^{-1} \text{ decade}^{-1}$  between 2004 and 2019 from  
 521 IAGOS (crosses), SHADOZ (squares), IAGOS fused with SHADOZ (circles), OMI (triangles  
 522 up) and OMI/MLS (triangles down) above the five continental IAGOS regions (Americas,  
 523 Africa, India, Southeast Asia and Malaysia/Indonesia) and two oceanic SHADOZ regions  
 524 (Samoa and Natal + Ascension Island). The left panel shows the trends of ozone as a function of  
 525 latitude. The right panel shows the trends of ozone on the map with the black rectangles  
 526 demarcating the five IAGOS regions. On the map, the longitude of the crosses, circles, triangles  
 527 and squares are arbitrary and the latitude is the mean latitude of the black rectangles or relative to  
 528 the SHADOZ sites. The direction of the arrows shows the magnitude of the trends and the colors  
 529 indicate the  $p$ -value. The TTCO trends from in situ data are calculated from the monthly TTCO  
 530 between the surface and 100 hPa, except over India where IAGOS profiles are available between  
 531 the surface and around 200 hPa. The TTCO trends from OMI and OMI/MLS are calculated from  
 532 the monthly TTCO defined between the surface and around 102-105 hPa (Figure S1).

533  
 534  
 535  
 536  
 537

538 **References**

539

540 Chang, K.-L., Cooper, O. R., Gaudel, A., Petropavlovskikh, I., and Thouret, V.: Statistical  
541 regularization for trend detection: an integrated approach for detecting long-term trends  
542 from sparse tropospheric ozone profiles, *Atmos. Chem. Phys.*, 20, 9915–9938,  
543 <https://doi.org/10.5194/acp-20-9915-2020>, 2020.

544

545 Chang, K. L., Cooper, O. R., Gaudel, A., Allaart, M., Ancellet, G., Clark, H., Godin-Beekmann,  
546 S., Leblanc, T., Van Malderen, R., Nédélec, P., and Petropavlovskikh, I.: Impact of the  
547 COVID-19 economic downturn on tropospheric ozone trends: An uncertainty weighted  
548 data synthesis for quantifying regional anomalies above western North America and  
549 Europe, *AGU Advances*, 3, e2021AV000542, <https://doi.org/10.1029/2021AV000542>,  
550 2022.

551

552 Chang, K.-L., Schultz, M. G., Koren, G., and Selke, N.: Guidance note on best statistical  
553 practices for TOAR analyses, <https://igacproject.org/activities/TOAR/TOAR-II> (last  
554 access: 23 August 2023), 2023.

555

556 Darras, S., Granier, C., Liousse, C., Boulanger, D., Elguindi, N., and Le Vu, H.: The ECCAD  
557 database, version 2: Emissions of atmospheric Compounds & Compilation of Ancillary  
558 Data, *IGAC Newsletter*, 2018

559

560 De Mazière, M., Thompson, A. M., Kurylo, M. J., Wild, J. D., Bernhard, G., Blumenstock, T.,  
561 Braathen, G. O., Hannigan, J. W., Lambert, J.-C., Leblanc, T., McGee, T. J., Nedoluha,  
562 G., Petropavlovskikh, I., Seckmeyer, G., Simon, P. C., Steinbrecht, W., and Strahan, S.  
563 E.: The Network for the Detection of Atmospheric Composition Change (NDACC):  
564 history, status and perspectives, *Atmos. Chem. Phys.*, 18, 4935–4964,  
565 <https://doi.org/10.5194/acp-18-4935-2018>, 2018.

566

567 Fishman, J., Watson, C. E., Larsen, J. C., and Logan, J. A.: Distribution of tropospheric ozone  
568 determined from satellite data, *J. Geophys. Res.*, 95, 3599–3617,  
569 <https://doi.org/10.1029/JD095iD04p03599>, 1990.

570

571 Logan, J. A.: An analysis of ozonesonde data for the troposphere: Recommendations for testing  
572 3-D models and development of a gridded climatology for tropospheric ozone, *J.*  
573 *Geophys. Res. Atmos.*, 104, 16115–16149, 1999.

574

575

576 Saunio, M., Emmons, L., Lamarque, J.-F., Tilmes, S., Wespes, C., Thouret, V., and Schultz, M.:  
577 Impact of sampling frequency in the analysis of tropospheric ozone observations, *Atmos.*  
578 *Chem. Phys.*, 12, 6757–6773, <https://doi.org/10.5194/acp-12-6757-2012>, 2012.

579

580 Sterling, C. W., Johnson, B. J., Oltmans, S. J., Smit, H. G. J., Jordan, A. F., Cullis, P. D., Hall, E.  
581 G., Thompson, A. M., and Witte, J. C.: Homogenizing and estimating the uncertainty in  
582 NOAA's long-term vertical ozone profile records measured with the electrochemical

583 concentration cell ozonesonde, *Atmos. Meas. Tech.*, 11, 3661–3687,  
584 <https://doi.org/10.5194/amt-11-3661-2018>, 2018.

585

586 Thompson, A. M., Witte, J. C., Sterling, C., Jordan, A., Johnson, B. J., Oltmans, S. J., Fujiwara,  
587 M., Vömel, H., Allaart, M., Piders, A., and Coetzee, G. J.: First reprocessing of Southern  
588 Hemisphere Additional Ozonesondes (SHADOZ) ozone profiles (1998–2016): 2.  
589 Comparisons with satellites and groundbased instruments, *J. Geophys. Res.-Atmos.*, 122,  
590 13000–13025, <https://doi.org/10.1002/2017JD027406>, 2017.

591

592 Torres, O., Bhartia, P. K., Jethva, H., and Ahn, C.: Impact of the ozone monitoring instrument  
593 row anomaly on the long-term record of aerosol products, *Atmos. Meas. Tech.*, 11, 2701–  
594 2715, <https://doi.org/10.5194/amt-11-2701-2018>, 2018

595

596 Witte, J. C., Thompson, A. M., Smit, H. G., Fujiwara, M., Posny, F., Coetzee, G. J., Northam, E.  
597 T., Johnson, B. J., Sterling, C.W., Mohamad, M., and Ogino, S. Y.: First reprocessing of  
598 Southern Hemisphere ADDitional OZonesondes (SHADOZ) profile records (1998–2015):  
599 1. Methodology and evaluation, *J. Geophys. Res.-Atmos.*, 122, 6611–6636, 2017.

600

601 Witte, J. C., Thompson, A. M., Smit, H. G. J., Vömel, H., Posny, F., and Stübi, R.: First  
602 reprocessing of SouthernHemisphere Additional OZonesondesprofile records: 3.  
603 Uncertainty in ozone profile and total column, *J. Geophys. Res.-Atmos.*, 123, 3243–3268,  
604 <https://doi.org/10.1002/2017JD027791>, 2018.

605

606 Ziemke, J. R., Chandra, S., and Bhartia, P. K.: Two new methods for deriving tropospheric  
607 column ozone from TOMS measurements: The assimilated UARS MLS/HALOE and  
608 convective-cloud differential techniques, *J. Geophys. Res.*, 103, 22115–22127, 1998.

609

610 Ziemke, J. R., Chandra, S., Duncan, B. N., Froidevaux, L., Bhartia, P. K., Levelt, P. F., and  
611 Waters, J. W.: Tropospheric ozone determined from Aura OMI and MLS: Evaluation of  
612 measurements and comparison with the Global Modeling Initiative’s Chemical Transport  
613 Model, *J. Geophys. Res.-Atmos.*, 111, D19, <https://doi.org/10.1029/2006JD007089>, 2006

614

615 Ziemke, J. R., Oman, L. D., Strode, S. A., Douglass, A. R., Olsen, M. A., McPeters, R. D.,  
616 Bhartia, P. K., Froidevaux, L., Labow, G. J., Witte, J. C., Thompson, A. M., Haffner, D.  
617 P., Kramarova, N. A., Frith, S. M., Huang, L.-K., Jaross, G. R., Seftor, C. J., Deland, M.  
618 T., and Taylor, S. L.: Trends in global tropospheric ozone inferred from a composite  
619 record of TOMS/OMI/MLS/OMPS satellite measurements and the MERRA-2 GMI  
620 simulation, *Atmos. Chem. Phys.*, 19, 3257–3269, [https://doi.org/10.5194/acp-19-3257-](https://doi.org/10.5194/acp-19-3257-2019)  
621 2019, 2019.

622

623

624
